# Supplementary material for: Metal-free photoredox-catalyzed direct α-oxygenation of N,N-dibenzylanilines to imides under visible light
Source: Royal Society of Chemistry journal article supplement (doi:10.1039/d2ra00585a), 2022-01-01
Supplement: d2ra00585a1.pdf [file d2ra00585a1.pdf]

**Metal-Free Photoredox Catalyzed Direct  $\alpha$ -Oxygenation of *N,N*-dibenzylanilines to Imides  
Under Visible Light**

Neerathilingam Nalladhambi and Ramasamy Anandhan\*

Department of Organic Chemistry, University of Madras, Guindy Campus, Chennai-600 025,  
Tamil Nadu, India. Email: [ananthanramasamy@gmail.com](mailto:ananthanramasamy@gmail.com)

| <b><u>S.No</u></b> | <b><u>Table of contents</u></b>                                                              | <b><u>Pages</u></b> |
|--------------------|----------------------------------------------------------------------------------------------|---------------------|
| <b>1</b>           | <b>General considerations</b>                                                                | <b>S1</b>           |
| <b>2</b>           | <b>Characterization data for the products</b>                                                | <b>S3-S9</b>        |
| <b>3</b>           | <b>References</b>                                                                            | <b>S9</b>           |
| <b>4</b>           | <b><math>^1\text{H}</math>, <math>^{13}\text{C}</math> NMR and HRMS spectra of compounds</b> | <b>S10 – S33</b>    |

## 1. General considerations:

The  $^1\text{H}$  and  $^{13}\text{C}$  NMR spectra were recorded in  $\text{CDCl}_3$  on Bruker spectrometers 300 MHz NMR spectrometer with TMS as an internal standard. Mass spectra were recorded on Xevo G2S Q-TOF spectrometer. The light source for photochemical reactions was Kessil 456nm Blue LED (model number: KSPR160L-456-EU). Different wave lengths containing LEDs such as 370nm, 390nm, 467nm and 527nm were purchased from Kessil and used. Reaction tubes made of borosilicate glass were used as reaction vessels. The distance between the light source and the reaction vessel was 8 cm. TLC was performed on using Merck pre-coated TLC plates (Merck 60 F254) and detected under UV light. Column chromatographic separation was carried out with silica gel (100-200 mesh). Reagents and solvents were purified as per standard procedures and used.

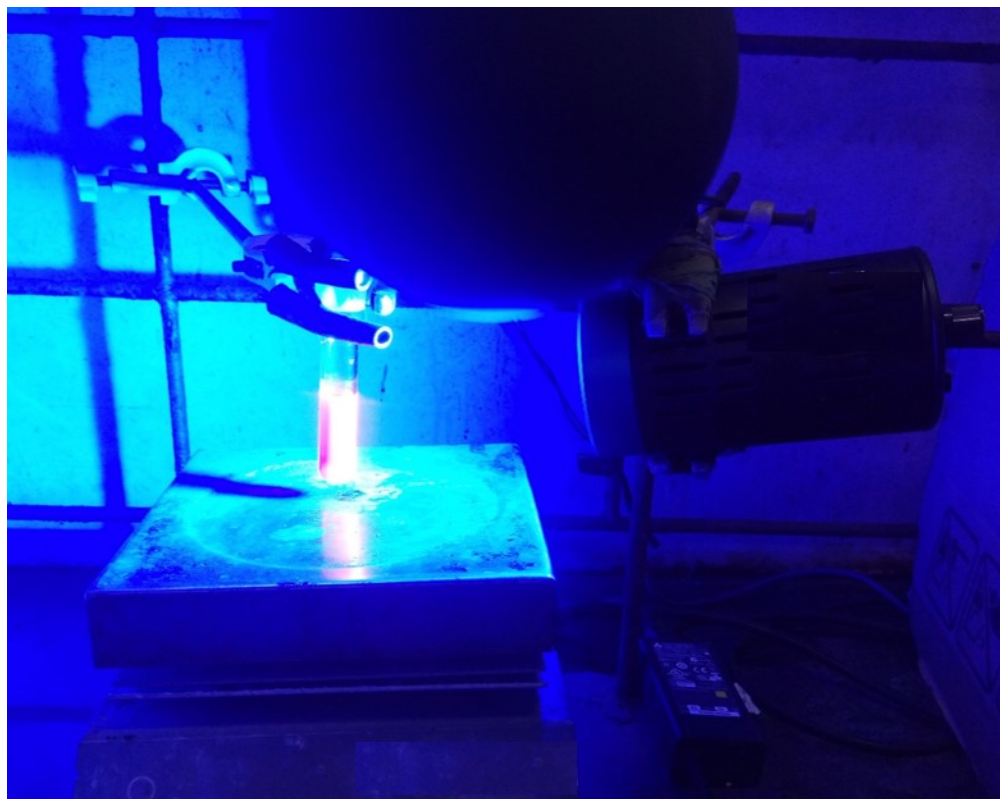

**Figure S1:** Reaction setup with Kessil PR160L-456nm Blue LED

## 2. Characterization data for the products

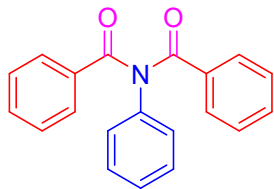

### *N*-benzoyl-*N*-phenylbenzamide **2a**<sup>1</sup>.

**2a** (81 mg) was obtained from **1a** (98 mg) following general procedure B; White solid; 75% yield (eluent: EtOAc/Hexanes= 1:9); <sup>1</sup>H NMR (300 MHz, CDCl<sub>3</sub>): δ<sub>H</sub> 8.11 (d, *J*= 7.2 Hz, 2H), 7.71 (t, *J*= 4.2 Hz, 2H), 7.58 (t, *J*= 7.5 Hz, 1H), 7.47-7.38 (m, 4H), 7.35-7.28 (m, 4H), 7.26 (d, *J*= 7.5 Hz, 1H), 7.19-7.16 (m, 1H). <sup>13</sup>C NMR (75 MHz, CDCl<sub>3</sub>): δ<sub>C</sub> 173.4, 140.2, 135.0, 132.1, 129.4, 129.2, 128.4, 127.8, 127.5.

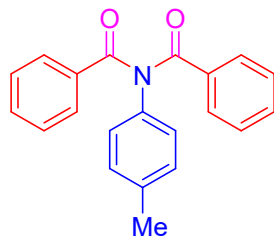

### *N*-benzoyl-*N*-(*p*-tolyl)benzamide **2b**.

**2b** (68 mg) was obtained from **1b** (107 mg) following general procedure B; White solid; 60% yield (eluent: EtOAc/Hexanes= 1:9); <sup>1</sup>H NMR (300 MHz, CDCl<sub>3</sub>): δ<sub>H</sub> 7.71 (t, *J*= 7.2 Hz, 4H), 7.43-7.38 (m, 2H), 7.33-7.24 (dd, *J*= 7.5 Hz, 11.4 Hz, 4H), 7.13 (d, *J*= 8.2 Hz, 2H), 7.05 (d, *J*= 8.1 Hz, 2H). <sup>13</sup>C NMR (75 MHz, CDCl<sub>3</sub>): δ<sub>C</sub> 173.5, 137.6, 135.2, 132.1, 130.2, 129.3, 128.4, 127.7, 21.0; HRMS: (M+H)<sup>+</sup> calculated for C<sub>21</sub>H<sub>17</sub>NO<sub>2</sub>: 316.1338, found: 316.1327.

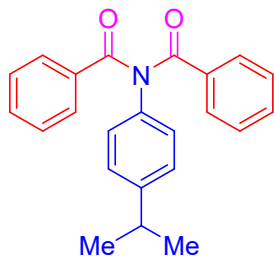

### *N*-benzoyl-*N*-(4-(*tert*-butyl)phenyl)benzamide **2c**.

**2c** (86 mg) was obtained from **1c** (113 mg) following general procedure B; White solid; 70% yield (eluent: EtOAc/Hexanes= 1:9); <sup>1</sup>H NMR (300 MHz, CDCl<sub>3</sub>): δ<sub>H</sub> 7.73 (d, *J*= 7.5 Hz, 4H), 7.40 (t,

$J= 7.2$  Hz, 2H), 7.30 (t,  $J= 7.8$  Hz, 4H), 7.19 (d,  $J= 8.1$  Hz, 2H), 7.10 (d,  $J= 8.4$  Hz, 2H). 2.87 (t,  $J= 6.9$  Hz, 1H), 1.21 (d,  $J= 6.9$  Hz, 6H).  $^{13}\text{C}$  NMR (75 MHz,  $\text{CDCl}_3$ ): $\delta_{\text{C}}$  173.5, 148.4, 137.8, 135.3, 132.1, 129.3, 128.4, 127.6, 127.5, 33.7, 23.8; HRMS:  $(\text{M}+\text{H})^+$  calculated for  $\text{C}_{23}\text{H}_{21}\text{NO}_2$ : 344.1650, found: 344.1638.

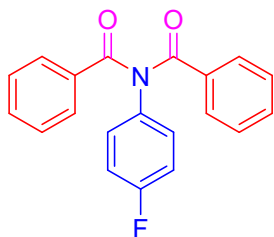

***N*-benzoyl-*N*-(4-fluorophenyl)benzamide **2d**.**

**2d** (86 mg) was obtained from **1d** (104 mg) following general procedure B; White solid; 75% yield (eluent: EtOAc/Hexanes= 1:9);  $^1\text{H}$  NMR (300 MHz,  $\text{CDCl}_3$ ): $\delta_{\text{H}}$  7.71 (d,  $J= 7.2$  Hz, 4H), 7.41 (t,  $J= 7.5$  Hz, 2H), 7.31 (t,  $J= 7.8$  Hz, 4H), 7.18- 7.14 (m, 2H), 7.03 (t,  $J= 7.2$  Hz, 2H).  $^{13}\text{C}$  NMR (75 MHz,  $\text{CDCl}_3$ ): $\delta_{\text{C}}$  173.2, 163.3, 160.0, 134.8, 132.3, 129.6, 129.5, 129.5, 129.2, 128.5, 128.4, 116.6, 116.3; HRMS:  $(\text{M}+\text{H})^+$  calculated for  $\text{C}_{20}\text{H}_{14}\text{FNO}_2$ : 320.1081, found: 320.1077.

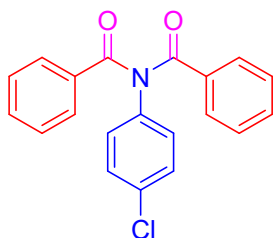

***N*-benzoyl-*N*-(4-chlorophenyl)benzamide **2e**.**

**2e** (102 mg) was obtained from **1e** (110 mg) following general procedure B; White solid; 85% yield (eluent: EtOAc/Hexanes= 1:9);  $^1\text{H}$  NMR (300 MHz,  $\text{CDCl}_3$ ): $\delta_{\text{H}}$  8.10 (d,  $J= 7.2$  Hz, 1H), 7.71 (d,  $J= 7.2$  Hz, 3H), 7.48-7.29 (m, 8H), 7.11 (d,  $J= 8.4$  Hz, 1H).  $^{13}\text{C}$  NMR (75 MHz,  $\text{CDCl}_3$ ): $\delta_{\text{C}}$  173.1, 138.7, 134.7, 133.6, 132.4, 130.1, 129.6, 129.0, 128.4; HRMS:  $(\text{M}+\text{H})^+$  calculated for  $\text{C}_{20}\text{H}_{14}\text{ClNO}_2$ : 336.0791, found: 336.0785.

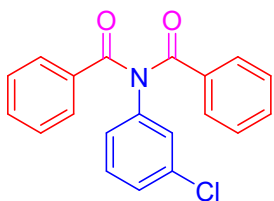

***N*-benzoyl-*N*-(3-chlorophenyl)benzamide 2f.**

**2f** (111 mg) was obtained from **1f** (110 mg) following general procedure B; White solid; 92% yield (eluent: EtOAc/Hexanes= 1:9);  $^1\text{H}$  NMR (300 MHz,  $\text{CDCl}_3$ ):  $\delta_{\text{H}}$  7.72 (d,  $J= 7.2$  Hz, 4H), 7.44-7.39 (m, 3H), 7.31 (t,  $J= 7.8$  Hz, 4H), 7.27- 7.23 (m, 2H), 7.08-7.05 (m, 1H).  $^{13}\text{C}$  NMR (75 MHz,  $\text{CDCl}_3$ ):  $\delta_{\text{C}}$  173.1, 141.4, 135.1, 134.8, 132.5, 130.3, 129.3, 128.6, 128.1, 127.9, 126.2; HRMS:  $(\text{M}+\text{H})^+$  calculated for  $\text{C}_{20}\text{H}_{14}\text{ClNO}_2$ : 336.0791, found: 336.0783.

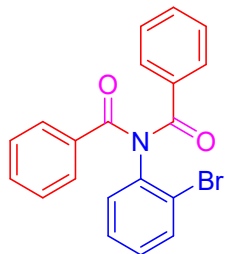

***N*-benzoyl-*N*-(2-bromophenyl)benzamide 2g.**

**2g** (102 mg) was obtained from **1g** (126 mg) following general procedure B; White solid; 75% yield (eluent: EtOAc/Hexanes= 1:9);  $^1\text{H}$  NMR (300 MHz,  $\text{CDCl}_3$ ):  $\delta_{\text{H}}$  7.80 (d,  $J= 7.2$  Hz, 4H), 7.66 (d,  $J= 7.5$  Hz, 1H), 7.41 (t,  $J= 7.2$  Hz, 2H), 7.32 (t,  $J= 7.2$  Hz, 4H), 7.22 (t,  $J= 5.7$  Hz, 1H), 7.13-7.10 (dd,  $J= 2.7$  Hz, 2.4 Hz, 2H).  $^{13}\text{C}$  NMR (75 MHz,  $\text{CDCl}_3$ ):  $\delta_{\text{C}}$  172.6, 139.5, 134.7, 133.8, 132.3, 130.8, 129.5, 129.1, 128.5, 128.4, 122.6; HRMS:  $(\text{M}+\text{H})^+$  calculated for  $\text{C}_{20}\text{H}_{14}\text{BrNO}_2$ : 380.0286, found: 336.0258.

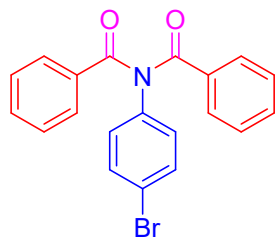

***N*-benzoyl-*N*-(4-bromophenyl)benzamide 2h.**

**2h** (95 mg) was obtained from **1h** (126 mg) following general procedure B; White solid; 70% yield (eluent: EtOAc/Hexanes= 1:9);  $^1\text{H}$  NMR (300 MHz,  $\text{CDCl}_3$ ):  $\delta_{\text{H}}$  7.86 (d,  $J= 7.8$  Hz, 3H), 7.77 (s, 1H), 7.55-7.53 (t,  $J= 8.7$  Hz, 5H), 7.50 (d,  $J= 5.7$  Hz, 4H), 7.46 (d,  $J= 1.8$  Hz, 1H).  $^{13}\text{C}$  NMR (75 MHz,  $\text{CDCl}_3$ ):  $\delta_{\text{C}}$  173.0, 139.2, 134.7, 132.6, 132.4, 129.3, 129.2, 128.5, 121.4.

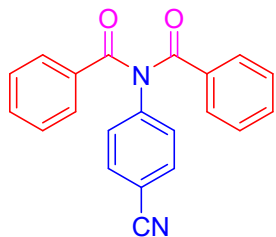

***N*-benzoyl-*N*-(4-cyanophenyl)benzamide **2i**.**

**2i** (45 mg) was obtained from **1i** (107 mg) following general procedure B; White solid; 39% yield (eluent: EtOAc/Hexanes= 1:9);  $^1\text{H NMR}$  (300 MHz,  $\text{CDCl}_3$ ): $\delta_{\text{H}}$  8.01 (d,  $J= 7.2$  Hz, 4H), 7.63-7.53 (dd,  $J= 7.5$  Hz, 8.1 Hz, 2H), 7.37 (t,  $J= 7.2$  Hz, 3H), 7.27-7.19 (m, 5H).  $^{13}\text{C NMR}$  (75 MHz,  $\text{CDCl}_3$ ): $\delta_{\text{C}}$  172.8, 144.3, 134.3, 133.2, 132.8, 129.3, 128.7, 128.2, 117.8, 111.2.

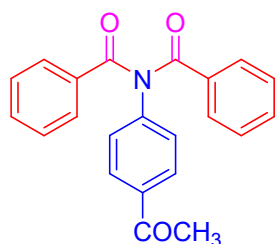

***N*-(4-acetylphenyl)-*N*-benzoylbenzamide **2j**.**

**2j** (55 mg) was obtained from **1j** (113 mg) following general procedure B; White solid; 45% yield (eluent: EtOAc/Hexanes= 1:9);  $^1\text{H NMR}$  (300 MHz,  $\text{CDCl}_3$ ): $\delta_{\text{H}}$  7.83 (d,  $J= 8.4$  Hz, 2H), 7.63 (d,  $J= 7.2$  Hz, 4H), 7.34 (t,  $J= 6.6$  Hz, 2H), 7.23 (d,  $J= 7.8$  Hz, 3H), 7.20 (d,  $J= 8.1$  Hz, 2H), 7.16 (d,  $J= 6.9$  Hz, 1H), 2.49 (s, 3H).  $^{13}\text{C NMR}$  (75 MHz,  $\text{CDCl}_3$ ): $\delta_{\text{C}}$  196.6, 173.0, 144.4, 135.9, 134.6, 132.6, 129.5, 129.3, 128.6, 127.6, 26.3.

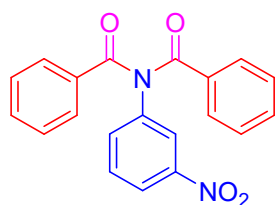

***N*-benzoyl-*N*-(3-nitrophenyl)benzamide **2k**.**

**2k** (37 mg) was obtained from **1k** (114 mg) following general procedure B; White solid; 30% yield (eluent: EtOAc/Hexanes= 1:9);  $^1\text{H NMR}$  (300 MHz,  $\text{CDCl}_3$ ): $\delta_{\text{H}}$  8.15 (d,  $J= 5.1$  Hz, 2H), 7.72-7.70 (t,  $J= 7.2$  Hz, 3H), 7.54-7.52 (m, 1H), 7.47-7.42 (t,  $J= 7.5$  Hz, 2H), 7.35 (d,  $J= 7.8$  Hz, 3H), 7.32-

7.30 (t,  $J=1.5$  Hz, 3H).  $^{13}\text{C}$  NMR (75 MHz,  $\text{CDCl}_3$ ):  $\delta_{\text{C}}$  172.9, 148.9, 134.4, 133.7, 132.8, 130.1, 129.3, 128.7, 127.0, 122.9, 122.3.

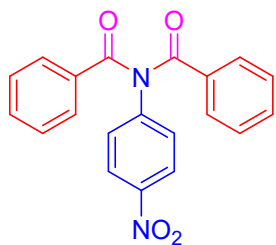

#### ***N*-benzoyl-*N*-(4-nitrophenyl)benzamide 2l.**

**2l** (37 mg) was obtained from **1l** (114 mg) following general procedure B; White solid; 30% yield (eluent: EtOAc/Hexanes= 1:9);  $^1\text{H}$  NMR (300 MHz,  $\text{CDCl}_3$ ):  $\delta_{\text{H}}$  8.24 (d,  $J=9$  Hz, 1H), 8.14 (d,  $J=7.5$  Hz, 3H), 7.74 (d,  $J=7.2$  Hz, 2H), 7.62 (d,  $J=7.5$  Hz, 1H), 7.49 (t,  $J=7.5$  Hz, 4H) 7.39-7.27 (m, 2H).  $^{13}\text{C}$  NMR (75 MHz,  $\text{CDCl}_3$ ):  $\delta_{\text{C}}$  172.8, 145.8, 133.6, 132.9, 130.2, 129.3, 128.7, 128.4, 124.8.

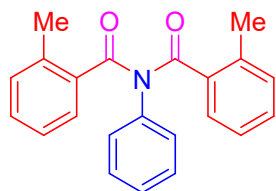

#### **2-methyl-*N*-(2-methylbenzoyl)-*N*-phenylbenzamide 4a<sup>2</sup>.**

**4a** (78 mg) was obtained from **3a** (108 mg) following general procedure B; White solid; 66% yield (eluent: EtOAc/Hexanes= 1:9);  $^1\text{H}$  NMR (300 MHz,  $\text{CDCl}_3$ ):  $\delta_{\text{H}}$  7.39 (d,  $J=7.2$  Hz, 2H), 7.28 (d,  $J=7.2$  Hz, 2H), 7.19 (d,  $J=8.1$  Hz, 3H), 7.09 (d,  $J=7.2$  Hz, 2H), 7.02-6.95 (dd,  $J=7.2$  Hz, 7.5 Hz, 4H), 2.30 (s, 6H).  $^{13}\text{C}$  NMR (75 MHz,  $\text{CDCl}_3$ ):  $\delta_{\text{C}}$  173.2, 139.5, 137.7, 136.1, 131.1, 130.6, 129.3, 127.9, 127.7, 127.6, 125.3, 19.8.

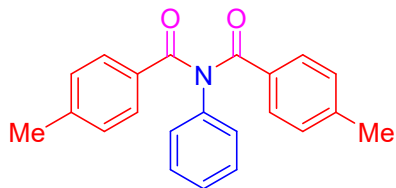

#### **4-methyl-*N*-(4-methylbenzoyl)-*N*-phenylbenzamide 4b<sup>2</sup>.**

**4b** (65 mg) was obtained from **3b** (108 mg) following general procedure B; White solid; 55% yield (eluent: EtOAc/Hexanes= 1:9);  $^1\text{H}$  NMR (300 MHz,  $\text{CDCl}_3$ ):  $\delta_{\text{H}}$  7.52 (d,  $J=8.1$  Hz, 2H), 7.44 (d,

$J= 7.2$  Hz, 2H), 7.23 (d,  $J= 9.9$  Hz, 1H), 7.18 (d,  $J= 8.1$  Hz, 3H), 7.15-7.03 (m, 5H), 2.35 (s, 6H).  $^{13}\text{C}$  NMR (75 MHz,  $\text{CDCl}_3$ ):  $\delta_{\text{C}}$  172.9, 137.8, 135.8, 132.5, 131.2, 130.8, 129.4, 127.5, 125.3, 19.7.

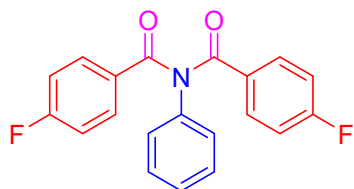

#### 4-fluoro-*N*-(4-fluorobenzoyl)-*N*-phenylbenzamide **4c<sup>2</sup>**.

**4c** (80 mg) was obtained from **3c** (111 mg) following general procedure B; White solid; 66% yield (eluent: EtOAc/Hexanes= 1:9);  $^1\text{H}$  NMR (300 MHz,  $\text{CDCl}_3$ ):  $\delta_{\text{H}}$  7.76-7.75 (t,  $J= 5.4$  Hz, 4H), 7.38-7.33 (t,  $J= 6.6$  Hz, 2H), 7.29-7.25 (t,  $J= 7.2$  Hz, 2H), 7.16 (d,  $J= 7.5$  Hz, 2H), 7.04 (t,  $J= 8.4$  Hz, 3H).  $^{13}\text{C}$  NMR (75 MHz,  $\text{CDCl}_3$ ):  $\delta_{\text{C}}$  172.1, 166.8, 163.4, 140.1, 131.9, 131.8, 130.8, 129.6, 129.1, 127.8, 127.7, 115.9, 115.6.

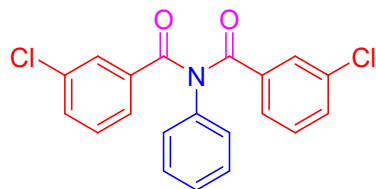

#### 3-chloro-*N*-(3-chlorobenzoyl)-*N*-phenylbenzamide **4d<sup>2</sup>**.

**4d** (93 mg) was obtained from **3f** (123 mg) following general procedure B; White solid; 70% yield (eluent: EtOAc/Hexanes= 1:9);  $^1\text{H}$  NMR (300 MHz,  $\text{CDCl}_3$ ):  $\delta_{\text{H}}$  7.69 (s, 2H), 7.56 (d,  $J= 7.8$  Hz, 2H), 7.42-7.34 (dd,  $J= 8.1$  Hz, 7.5 Hz, 4H), 7.31-7.23 (m, 3H), 7.15 (d,  $J= 7.2$  Hz, 2H).  $^{13}\text{C}$  NMR (75 MHz,  $\text{CDCl}_3$ ):  $\delta_{\text{C}}$  171.7, 139.4, 136.3, 134.8, 132.3, 129.7, 129.7, 129.3, 128.1, 127.8, 127.0.

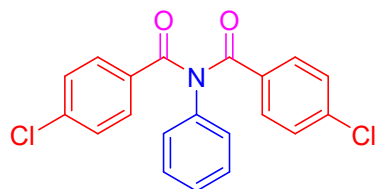

#### 4-chloro-*N*-(4-chlorobenzoyl)-*N*-phenylbenzamide **4e<sup>2</sup>**.

**4e** (90 mg) was obtained from **3g** (123 mg) following general procedure B; White solid; 68% yield (eluent: EtOAc/Hexanes= 1:9);  $^1\text{H}$  NMR (300 MHz,  $\text{CDCl}_3$ ):  $\delta_{\text{H}}$  8.06 (d,  $J= 7.8$  Hz, 2H), 7.69 (d,  $J= 7.5$  Hz, 3H), 7.48 (d,  $J= 7.5$  Hz, 2H), 7.35 (d,  $J= 8.1$  Hz, 4H), 7.17 (d,  $J= 6.3$  Hz, 2H).  $^{13}\text{C}$  NMR (75 MHz,  $\text{CDCl}_3$ ):  $\delta_{\text{C}}$  172.2, 138.9, 133.0, 131.6, 130.7, 129.7, 128.9, 128.9, 127.8.



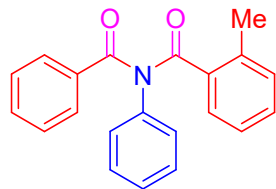

***N*-benzoyl-2-methyl-*N*-phenylbenzamide 4f.**

**4f** (60 mg) was obtained from **3c** (103 mg) following general procedure B; White solid; 53% yield (eluent: EtOAc/Hexanes= 1:9);  $^1\text{H}$  NMR (300 MHz,  $\text{CDCl}_3$ ): $\delta_{\text{H}}$  7.70 (d,  $J= 7.2$  Hz, 2H), 7.53 (d,  $J= 7.5$  Hz, 1H), 7.44-7.32 (m, 4H), 7.29- 7.22 (m, 5H), 7.14 (t,  $J= 6.3$  Hz, 2H), 2.50 (s, 3H).  $^{13}\text{C}$  NMR (75 MHz,  $\text{CDCl}_3$ ): $\delta_{\text{C}}$  171.6, 171.3, 138.0, 136.1, 133.9, 133.5, 130.3, 129.4, 128.8, 127.5, 127.3, 126.5, 126.0, 125.8, 123.6, 18.0.

**3. References**

1. A. Ben-Haida, P. Hodge and H. M. Colquhoun, *Macromolecules*, 2005, **38**, 722-729.
2. A. A. Kadam, T. L. Metz, Y. Qian and L. M. Stanley, *ACS Catal.*, 2019, **9**, 5651-5656.

#### 4. $^1\text{H}$ , $^{13}\text{C}$ NMR and HRMS spectra of products

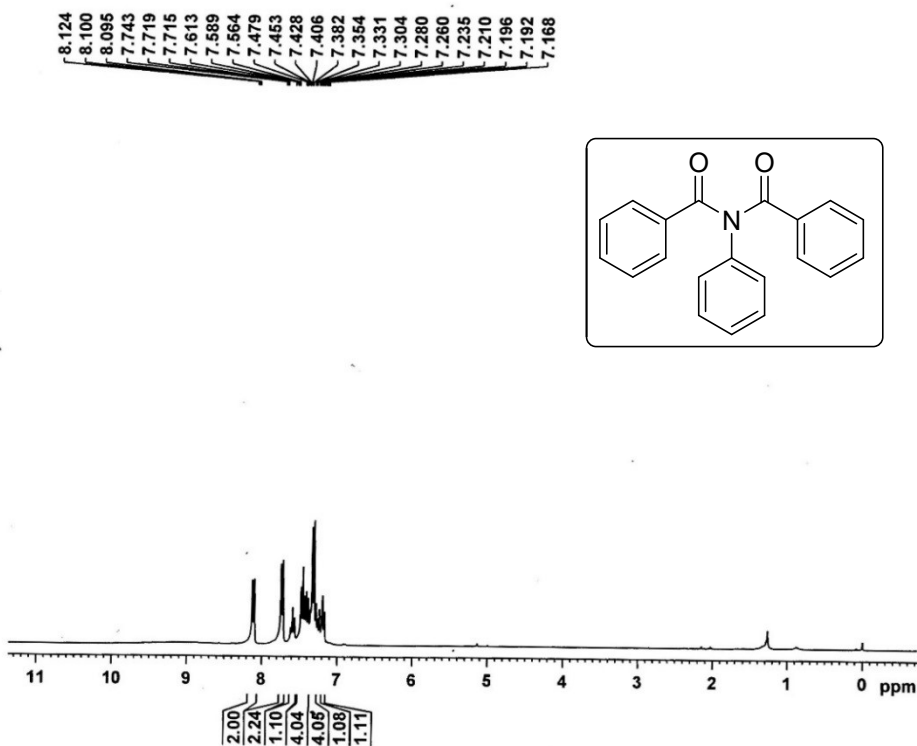

$^1\text{H}$  NMR (300 MHz) Spectrum of compound **2a**

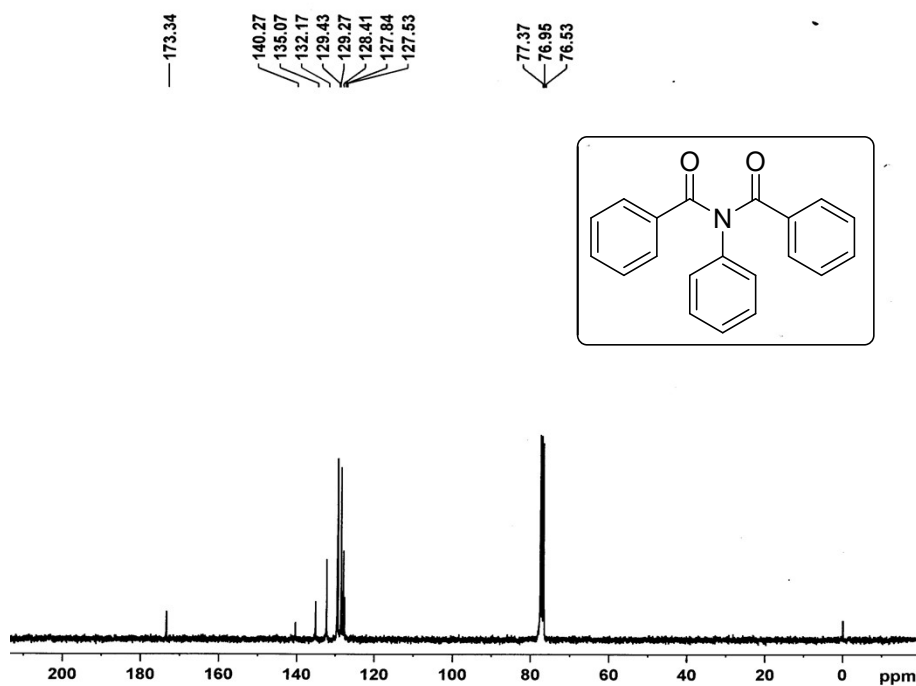

$^{13}\text{C}$  NMR (75 MHz) Spectrum of compound **2a**

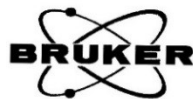

NAME RA-M4-164  
EXPNO 1  
PROCNO 1  
Date\_ 20190603  
Time 20.42  
INSTRUM spect  
PROBHD 5 mm DUL 13C-1  
PULPROG zg30  
TD 65536  
SOLVENT CDCl3  
NS 16  
DS 2  
SWH 6172.839 Hz  
FIDRES 0.094190 Hz  
AQ 5.3084860 sec  
RG 14  
DW 81.000 usec  
DE 6.50 usec  
TE 300.0 K  
D1 1.00000000 sec  
TDO 1

===== CHANNEL f1 =====  
NUC1 1H  
P1 12.00 usec  
PL1 -1.00 dB  
PL1W 13.28156662 W  
SFO1 300.1316534 MHz  
SI 32768  
SF 300.1300145 MHz  
WDW EM  
SSB 0  
LB 0.30 Hz  
GB 0  
PC 1.00

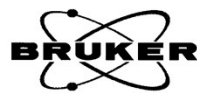

NAME RA-NL-1-119A  
EXPNO 3  
PROCNO 1  
Date\_ 20190407  
Time 10.24  
INSTRUM spect  
PROBHD 5 mm DUL 13C-1  
PULPROG zgpg30  
TD 65536  
SOLVENT CDCl3  
NS 1694  
DS 4  
SWH 17985.611 Hz  
FIDRES 0.274439 Hz  
AQ 1.8219508 sec  
RG 5792.6  
DW 27.800 usec  
DE 6.50 usec  
TE 300.0 K  
D1 2.00000000 sec  
D11 0.03000000 sec  
TDO 1

===== CHANNEL f1 =====  
NUC1 13C  
P1 10.68 usec  
PL1 0.00 dB  
PL1W 31.39858055 W  
SFO1 75.4752953 MHz

===== CHANNEL f2 =====  
CPDPRG2 waltz16  
NUC2 1H  
PCPD2 80.00 usec  
PL2 -1.00 dB  
PL12 15.48 dB  
PL13 16.00 dB  
PL2W 13.28156662 W  
PL12W 0.29870972 W  
PL13W 0.26500207 W  
SFO2 300.1312005 MHz  
SI 32768  
SF 75.4677490 MHz  
WDW EM  
SSB 0  
LB 1.00 Hz  
GB 0  
PC 1.40

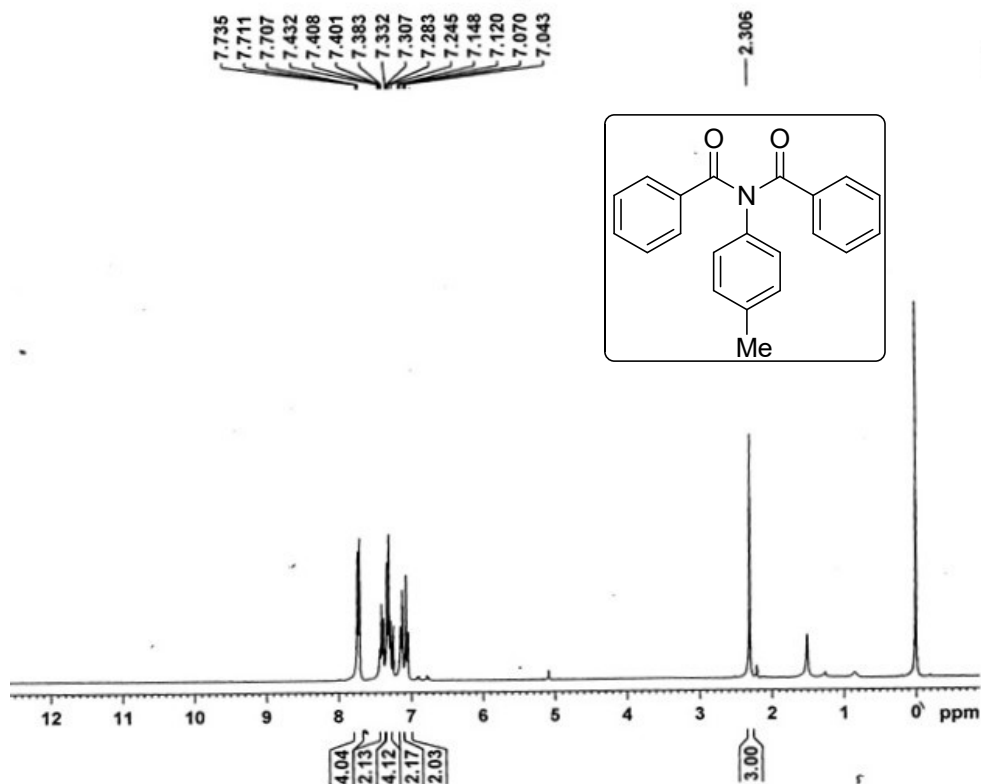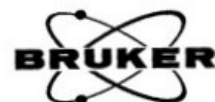

NAME RA-NL-1-116A  
 EXPNO 3  
 PROCNO 1  
 Date\_ 20190414  
 Time 13.56  
 INSTRUM spect  
 PROBHD 5 mm DUL 13C-1  
 PULPROG zg30  
 TD 65536  
 SOLVENT CDCl3  
 NS 16  
 DS 2  
 SWH 6172.839 Hz  
 FIDRES 0.094190 Hz  
 AQ 5.3084660 sec  
 RG 256  
 DW 81.000 usec  
 DE 6.50 usec  
 TE 300.0 K  
 D1 1.00000000 sec  
 TD0 1

===== CHANNEL f1 =====  
 NUC1 1H  
 P1 12.00 usec  
 PL1 -1.00 dB  
 PL1W 13.28156662 W  
 SFO1 300.1318534 MHz  
 SI 32768  
 SF 300.1300107 MHz  
 WDW EM  
 SSB 0  
 LB 0.30 Hz  
 GB 0  
 PC 1.00

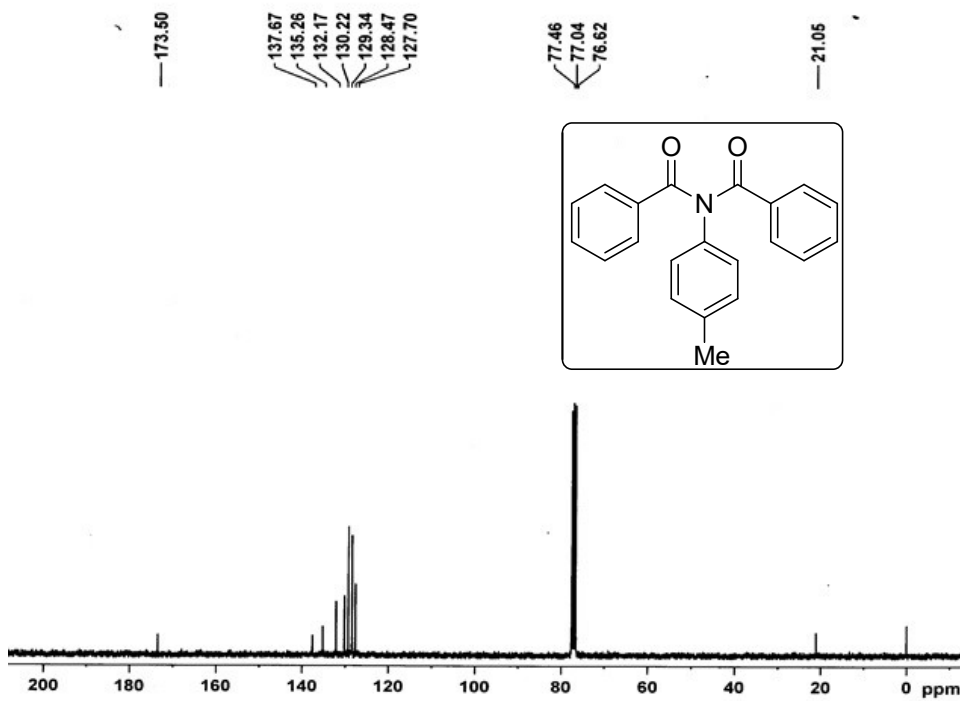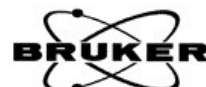

NAME RA-NL-1-116A  
 EXPNO 2  
 PROCNO 1  
 Date\_ 20190414  
 Time 13.27  
 INSTRUM spect  
 PROBHD 5 mm DUL 13C-1  
 PULPROG zgpg30  
 TD 65536  
 SOLVENT CDCl3  
 NS 785  
 DS 4  
 SWH 17985.611 Hz  
 FIDRES 0.274439 Hz  
 AQ 1.8219508 sec  
 RG 8192  
 DW 27.800 usec  
 DE 6.50 usec  
 TE 300.0 K  
 D1 2.00000000 sec  
 D11 0.03000000 sec  
 TD0 1

===== CHANNEL f1 =====  
 NUC1 13C  
 P1 10.68 usec  
 PL1 0.00 dB  
 PL1W 31.39858055 W  
 SFO1 75.4752953 MHz

===== CHANNEL f2 =====  
 CPDPRG2 waltz16  
 NUC2 1H  
 PCPD2 80.00 usec  
 PL2 -1.00 dB  
 PL12 15.48 dB  
 PL13 16.00 dB  
 PL2W 13.28156662 W  
 PL12W 0.29870972 W  
 PL13W 0.26500207 W  
 SFO2 300.1312005 MHz  
 SI 32768  
 SF 75.4677417 MHz  
 WDW EM  
 SSB 0  
 LB 1.00 Hz  
 GB 0  
 PC 1.40

<sup>13</sup>C NMR (75 MHz) Spectrum of compound 2b

Item name: MSR-6A-316  
Item description:

Channel name: Low energy : Time 0.2851 +/- 0.0677 minutes

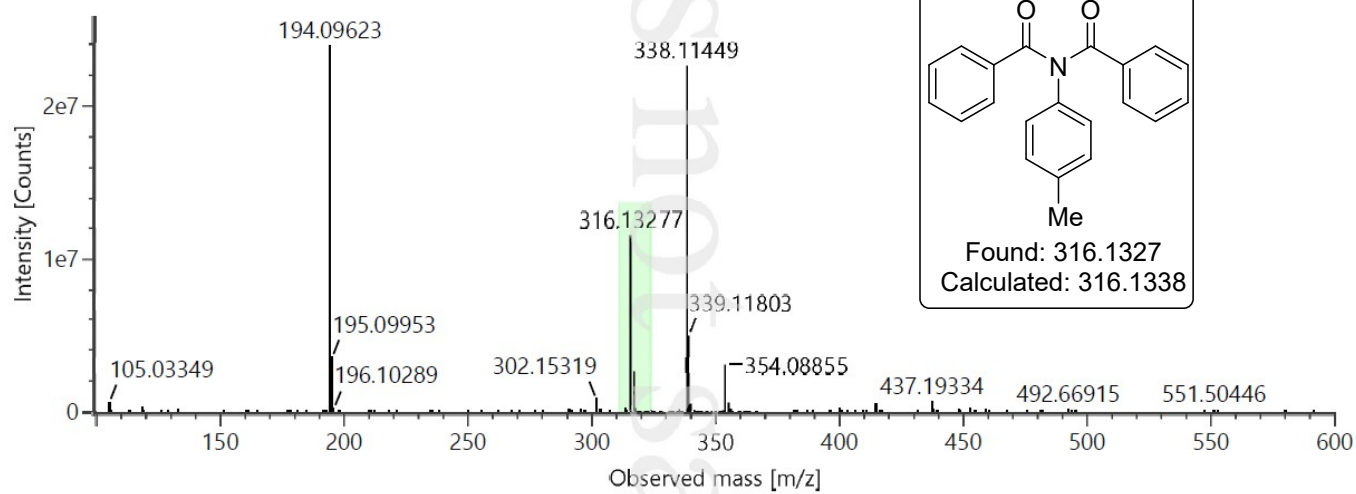

HRMS spectrum of compound 2b

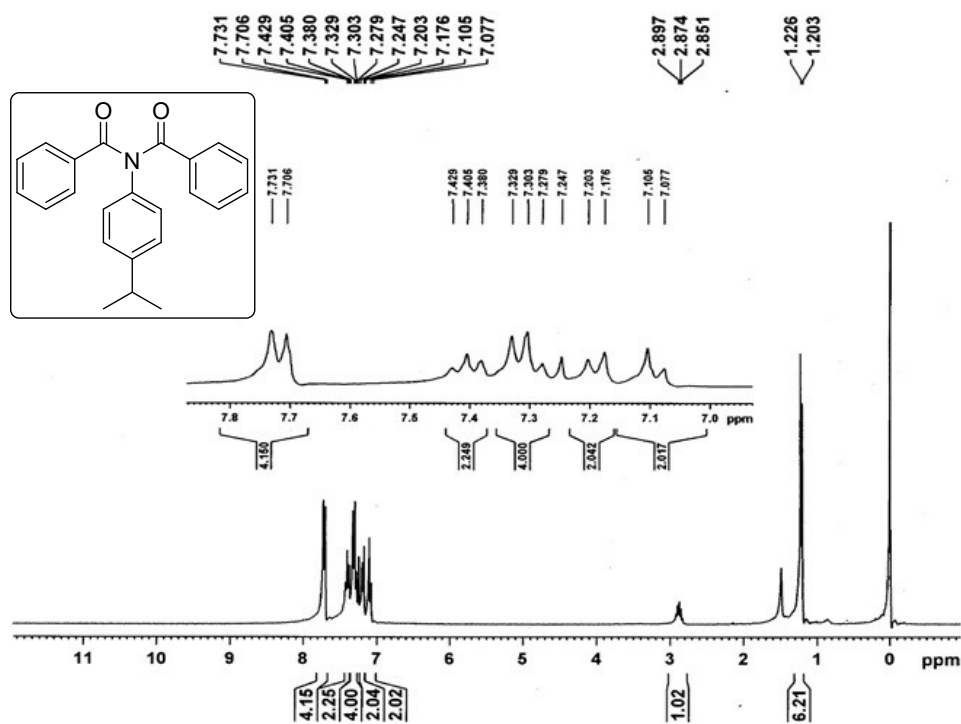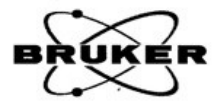

NAME RA-NL-1-105A  
 EXPNO 2  
 PROCNO 1  
 Date\_ 20190329  
 Time\_ 0.52  
 INSTRUM spect  
 PROBHD 5 mm DUL 13C-1  
 PULPROG zg30  
 TD 65536  
 SOLVENT CDCl3  
 NS 16  
 DS 2  
 SWH 6172.839 Hz  
 FIDRES 0.094190 Hz  
 AQ 5.3084660 sec  
 RG 322.5  
 DW 81.000 usec  
 DE 6.50 usec  
 TE 300.0 K  
 D1 1.00000000 sec  
 TD0 1

===== CHANNEL f1 =====  
 NUC1 1H  
 P1 12.00 usec  
 PL1 -1.00 dB  
 PL1W 13.28156662 W  
 SFO1 300.1318534 MHz  
 SI 32768  
 SF 300.1300099 MHz  
 WDW EM  
 SSB 0  
 LB 0.30 Hz  
 GB 0  
 PC 1.00

<sup>1</sup>H NMR (300 MHz) Spectrum of compound 2c

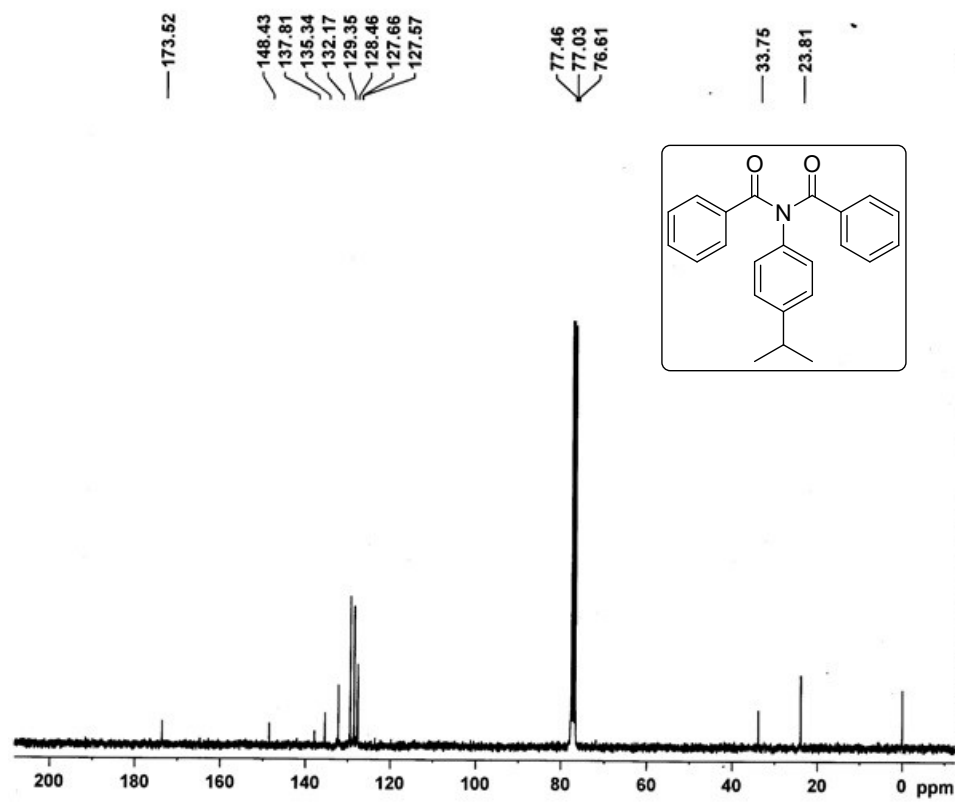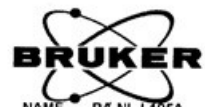

NAME RA-NL-1-105A  
 EXPNO 1  
 PROCNO 1  
 Date\_ 20190329  
 Time\_ 0.10  
 INSTRUM spect  
 PROBHD 5 mm DUL 13C-1  
 PULPROG zgpg30  
 TD 65536  
 SOLVENT CDCl3  
 NS 2197  
 DS 4  
 SWH 17985.611 Hz  
 FIDRES 0.274439 Hz  
 AQ 1.8219508 sec  
 RG 2896.3  
 DW 27.800 usec  
 DE 6.50 usec  
 TE 300.0 K  
 D1 2.00000000 sec  
 D11 0.03000000 sec  
 TD0 1

===== CHANNEL f1 =====  
 NUC1 13C  
 P1 10.68 usec  
 PL1 0.00 dB  
 PL1W 31.39658055 W  
 SFO1 75.4752953 MHz

===== CHANNEL f2 =====  
 CPDPRG2 waltz16  
 NUC2 1H  
 PCPD2 80.00 usec  
 PL2 -1.00 dB  
 PL12 15.48 dB  
 PL13 16.00 dB  
 PL2W 13.28156662 W  
 PL12W 0.29870972 W  
 PL13W 0.26500207 W  
 SFO2 300.1312005 MHz  
 SI 32768  
 SF 75.4677411 MHz  
 WDW EM  
 SSB 0  
 LB 1.00 Hz  
 GB 0  
 PC 1.40

<sup>13</sup>C NMR (75 MHz) Spectrum of compound 2c

Item name: MSR-5A-344  
Item description:

Channel name: Low energy : Time 0.2888 +/- 0.2033 minutes

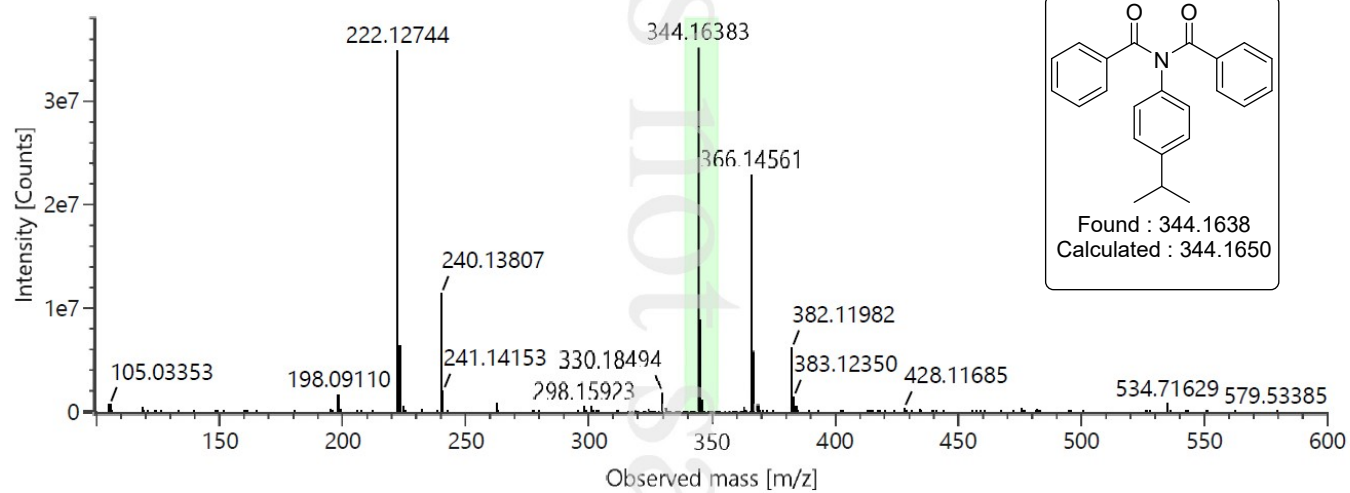

HRMS Spectrum of compound 2c

7.717  
7.693  
7.444  
7.419  
7.395  
7.340  
7.314  
7.290  
7.189  
7.173  
7.166  
7.159  
7.143  
7.058  
7.031  
7.002

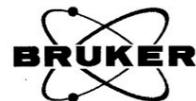

NAME RA-NL-1-85A  
EXPNO 2  
PROCNO 1  
Date\_ 20190619  
Time 18.22  
INSTRUM spect  
PROBHD 5 mm DUL 13C-1  
PULPROG zg30  
TD 65536  
SOLVENT CDCl3  
NS 16  
DS 2  
SWH 6172.839 Hz  
FIDRES 0.094190 Hz  
AQ 5.3064680 sec  
RG 228.1  
DW 81.000 usec  
DE 6.50 usec  
TE 300.0 K  
D1 1.00000000 sec  
TD0 1

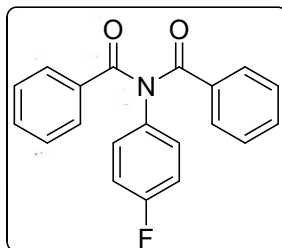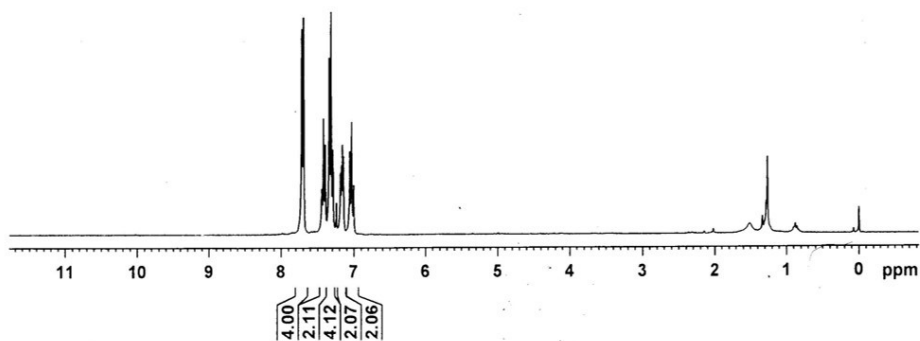

===== CHANNEL f1 =====  
NUC1 1H  
P1 12.00 usec  
PL1 -1.00 dB  
PL1W 13.28156662 W  
SFO1 300.1318534 MHz  
SI 32768  
SF 300.1300117 MHz  
WDW EM  
SSB 0  
LB 0.30 Hz  
GB 0  
PC 1.00

<sup>1</sup>H NMR (300 MHz) Spectrum of compound **2d**

173.27  
163.34  
160.06  
134.89  
132.32  
129.63  
129.52  
129.23  
128.49  
128.43  
116.61  
116.31

77.39  
76.97  
76.54

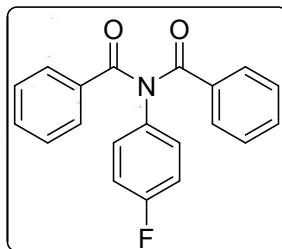

NAME RA-NL-1-245  
EXPNO 2  
PROCNO 1  
Date\_ 20190715  
Time 12.45  
INSTRUM spect  
PROBHD 5 mm DUL 13C-1  
PULPROG zgpg30  
TD 65536  
SOLVENT CDCl3  
NS 847  
DS 4  
SWH 17985.611 Hz  
FIDRES 0.274439 Hz  
AQ 1.8219508 sec  
RG 2896.3  
DW 27.800 usec  
DE 6.50 usec  
TE 300.0 K  
D1 2.00000000 sec  
D11 0.03000000 sec  
TD0 1

===== CHANNEL f1 =====  
NUC1 13C  
P1 10.68 usec  
PL1 0.00 dB  
PL1W 31.39858055 W  
SFO1 75.4752953 MHz

===== CHANNEL f2 =====  
CPDPRG2 waltz16  
NUC2 1H  
PCPD2 80.00 usec  
PL2 -1.00 dB  
PL12 15.48 dB  
PL13 16.00 dB  
PL2W 13.28156662 W  
PL12W 0.29870972 W  
PL13W 0.26500207 W  
SFO2 300.1312005 MHz  
SI 32768  
SF 75.4677490 MHz  
WDW EM  
SSB 0  
LB 1.00 Hz  
GB 0  
PC 1.40

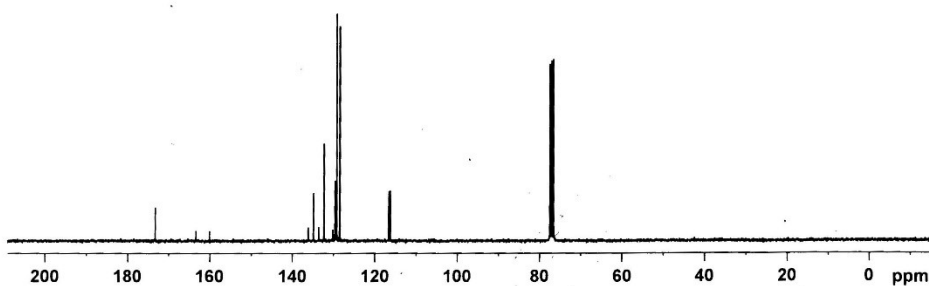

<sup>13</sup>C NMR (75 MHz) Spectrum of compound **2d**

Item name: MSR-03A-320  
Item description:

Channel name: Low energy : Time 0.2956 +/- 0.0677 minutes

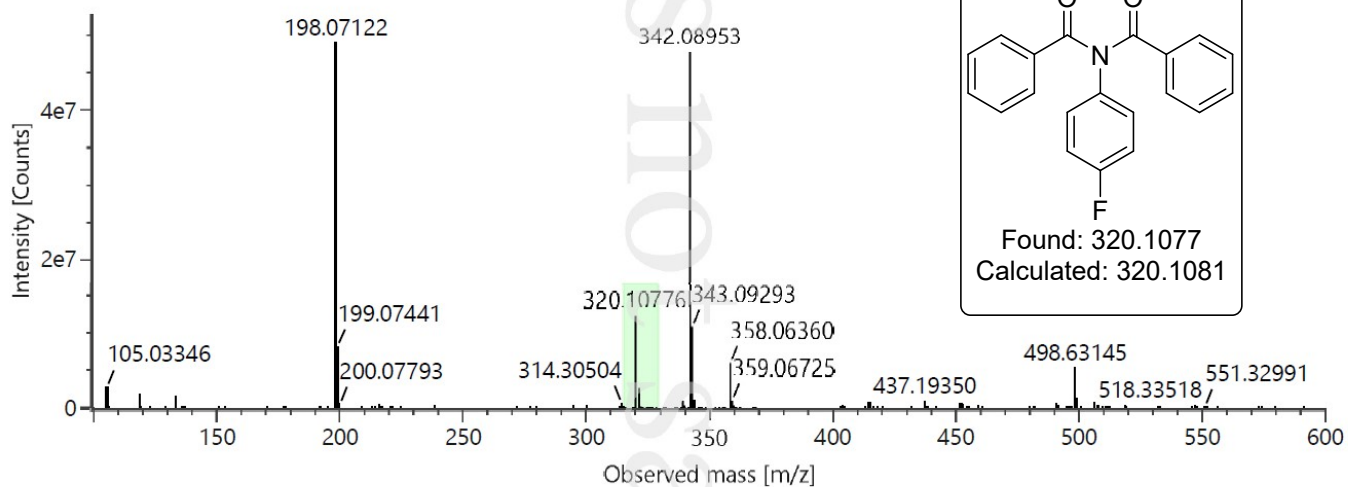

HRMS Spectrum of compound 2d



8.121  
8.097  
7.718  
7.694  
7.591  
7.566  
7.481  
7.455  
7.429  
7.422  
7.398  
7.340  
7.314  
7.294  
7.131  
7.103

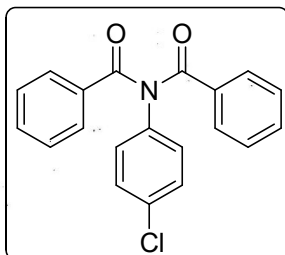

NAME RA-NL-1-210  
EXPNO 6  
PROCNO 1  
Date 20190711  
Time 18.19  
INSTRUM spect  
PROBHD 5 mm DUL 13C-1  
PULPROG zg30  
TD 65536  
SOLVENT CDCl3  
NS 16  
DS 2  
SWH 6172.839 Hz  
FIDRES 0.094190 Hz  
AQ 5.3084660 sec  
RG 161.3  
DW 81.000 usec  
DE 6.50 usec  
TE 300.0 K  
D1 1.00000000 sec  
TD0 1

===== CHANNEL f1 =====  
NUC1 1H  
P1 12.00 usec  
PL1 -1.00 dB  
PL1W 13.28156662 W  
SFO1 300.1318534 MHz  
SI 32768  
SF 300.1300129 MHz  
WDW EM  
SSB 0  
LB 0.30 Hz  
GB 0  
PC 1.00

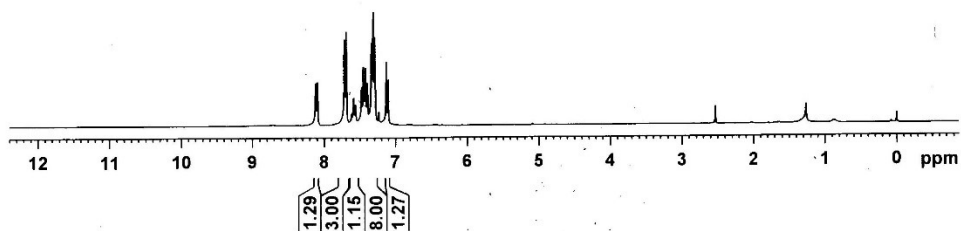

<sup>1</sup>H NMR (300 MHz) Spectrum of compound 2e

173.15  
138.74  
134.77  
133.63  
132.43  
130.17  
129.69  
129.05  
128.42  
77.39  
76.97  
76.55

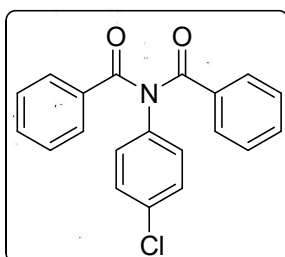

NAME RA-NL-1-210  
EXPNO 5  
PROCNO 1  
Date 20190711  
Time 18.13  
INSTRUM spect  
PROBHD 5 mm DUL 13C-1  
PULPROG zgpg30  
TD 65536  
SOLVENT CDCl3  
NS 1024  
DS 4  
SWH 17985.611 Hz  
FIDRES 0.274439 Hz  
AQ 1.8219508 sec  
RG 4098  
DW 27.800 usec  
DE 6.50 usec  
TE 300.0 K  
D1 2.00000000 sec  
D11 0.03000000 sec  
TD0 1

===== CHANNEL f1 =====  
NUC1 13C  
P1 10.68 usec  
PL1 0.00 dB  
PL1W 31.39858055 W  
SFO1 75.4752953 MHz

===== CHANNEL f2 =====  
CPDPRG2 waltz16  
NUC2 1H  
PCPD2 80.00 usec  
PL2 -1.00 dB  
PL12 15.48 dB  
PL13 16.00 dB  
PL2W 13.28156662 W  
PL12W 0.29870972 W  
PL13W 0.26500207 W  
SFO2 300.1312005 MHz  
SI 32768  
SF 75.4677490 MHz  
WDW EM  
SSB 0  
LB 1.00 Hz  
GB 0  
PC 1.40

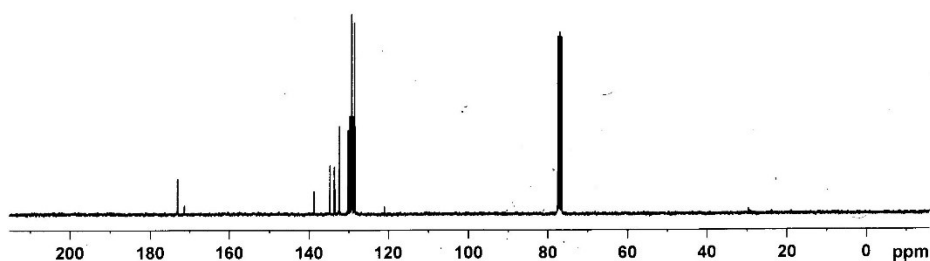

<sup>13</sup>C NMR (75 MHz) Spectrum of compound 2e

Item name: MSR-7A-336  
Item description:

Channel name: Low energy : Time 0.2850 +/- 0.0700 minutes

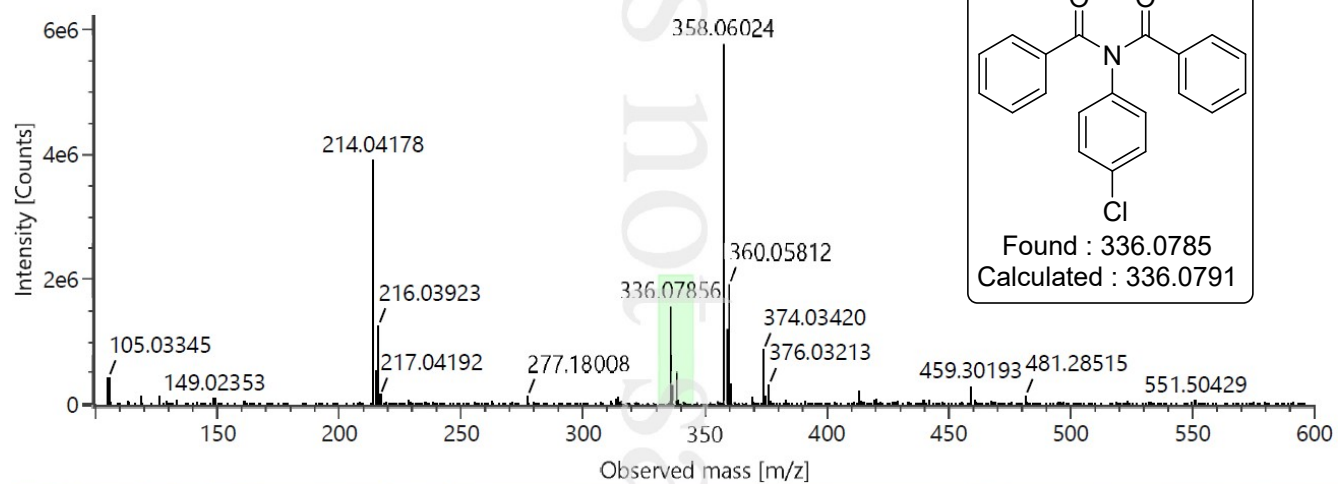

HRMS Spectrum of compound 2e

7.721  
7.697  
7.446  
7.442  
7.421  
7.397  
7.340  
7.314  
7.290  
7.275  
7.258  
7.238  
7.080  
7.072  
7.065  
7.061  
7.052

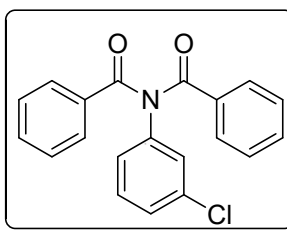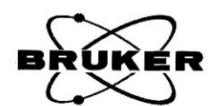

NAME RA-NL-1-111  
EXPNO 7  
PROCNO 1  
Date\_ 20190326  
Time 12.48  
INSTRUM spect  
PROBHD 5 mm DUL 13C-1  
PULPROG zg30  
TD 65536  
SOLVENT CDCl3  
NS 16  
DS 2  
SWH 6172.839 Hz  
FIDRES 0.094190 Hz  
AQ 5.3084660 sec  
RG 128  
DW 81.000 usec  
DE 6.50 usec  
TE 300.0 K  
D1 1.00000000 sec  
TD0 1

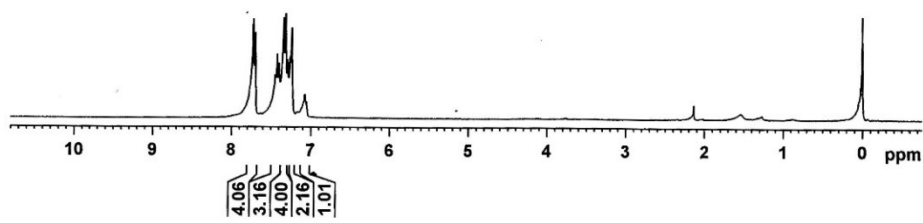

===== CHANNEL f1 =====  
NUC1 1H  
P1 12.00 usec  
PL1 -1.00 dB  
PL1W 13.28156662 W  
SFO1 300.1318534 MHz  
SI 32768  
SF 300.1300125 MHz  
WDW EM  
SSB 0  
LB 0.30 Hz  
GB 0  
PC 1.00

<sup>1</sup>H NMR (300 MHz) Spectrum of compound 2f

173.13  
141.41  
135.13  
134.81  
132.56  
130.35  
129.34  
128.63  
128.12  
127.93  
126.20

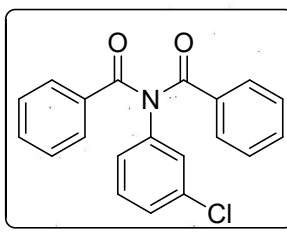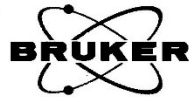

NAME RA-NL-1-111  
EXPNO 6  
PROCNO 1  
Date\_ 20190326  
Time 12.45  
INSTRUM spect  
PROBHD 5 mm DUL 13C-1  
PULPROG zgpg30  
TD 65536  
SOLVENT CDCl3  
NS 520  
DS 4  
SWH 17985.611 Hz  
FIDRES 0.274439 Hz  
AQ 1.8219508 sec  
RG 5792.6  
DW 27.800 usec  
DE 6.50 usec  
TE 300.0 K  
D1 2.00000000 sec  
D11 0.03000000 sec  
TD0 1

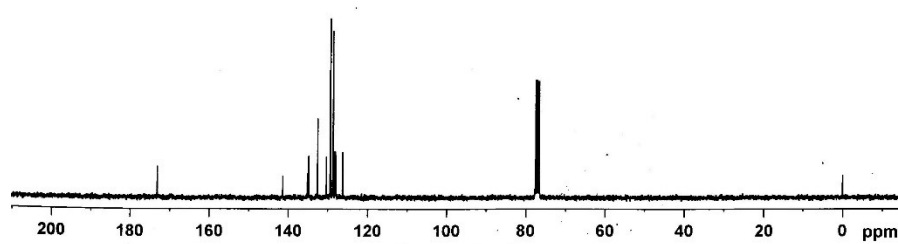

===== CHANNEL f1 =====  
NUC1 13C  
P1 10.68 usec  
PL1 0.00 dB  
PL1W 31.39858055 W  
SFO1 75.4752953 MHz  
===== CHANNEL f2 =====  
CPDPRG2 waltz16  
NUC2 1H  
PCPD2 80.00 usec  
PL2 -1.00 dB  
PL12 15.48 dB  
PL13 16.00 dB  
PL2W 13.28156662 W  
PL12W 0.29870972 W  
PL13W 0.26500207 W  
SFO2 300.1312005 MHz  
SI 32768  
SF 75.4677435 MHz  
WDW EM  
SSB 0  
LB 1.00 Hz  
GB 0  
PC 1.40

<sup>13</sup>C NMR (75 MHz) Spectrum of compound 2f

Item name: MSR-4A-336  
Item description:

Channel name: Low energy : Time 0.2880 +/- 0.0657 minutes

1.04e7

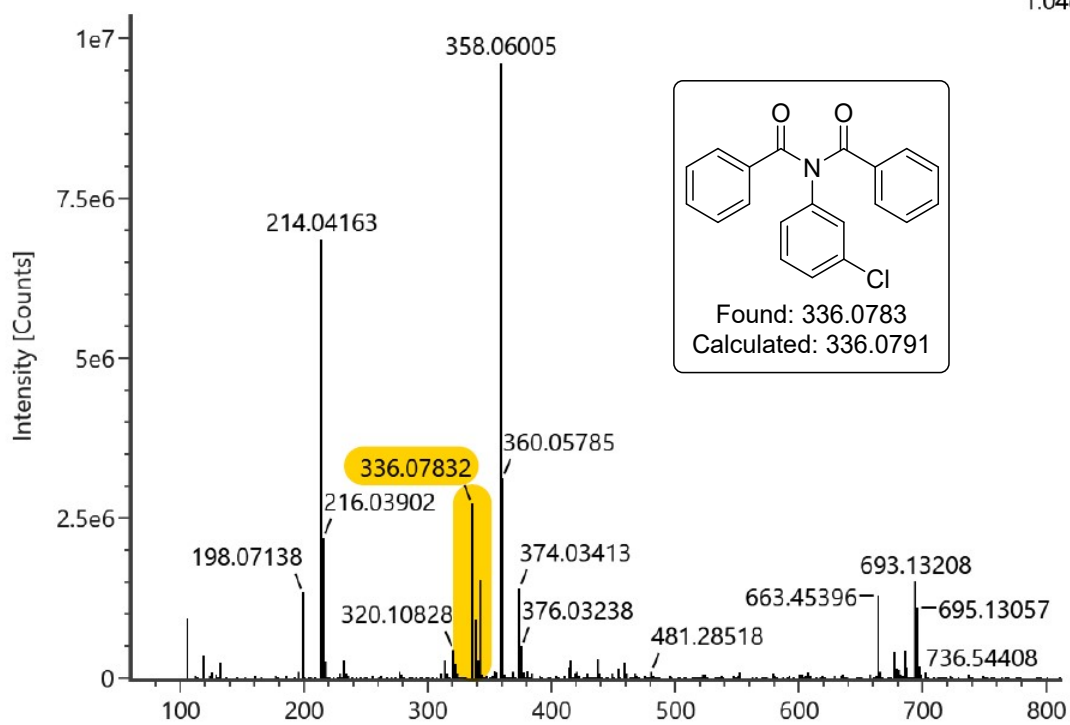

HRMS Spectrum of compound 2f

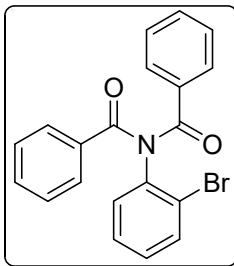

7.806  
7.782  
7.665  
7.640  
7.440  
7.416  
7.391  
7.343  
7.318  
7.294  
7.239  
7.220  
7.195  
7.160  
7.135  
7.126  
7.109  
7.101

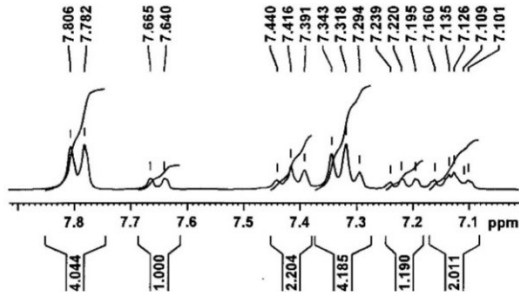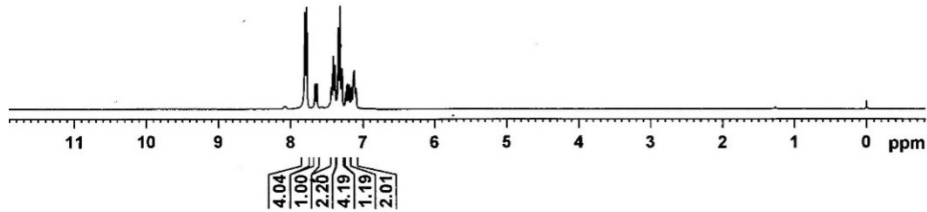

<sup>1</sup>H NMR (300 MHz) Spectrum of compound **2g**

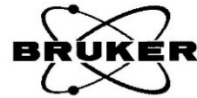

NAME RA-NL-1-259A  
EXPNO 3  
PROCNO 1  
Date\_ 20190718  
Time 16.18  
INSTRUM spect  
PROBHD 5 mm DUL 13C-1  
PULPROG zg30  
TD 65536  
SOLVENT CDCl3  
NS 16  
DS 2  
SWH 6172.839 Hz  
FIDRES 0.094190 Hz  
AQ 5.3084660 sec  
RG 228.1  
DW 81.000 usec  
DE 6.50 usec  
TE 300.0 K  
D1 1.00000000 sec  
TD0 1

===== CHANNEL f1 =====  
NUC1 1H  
P1 12.00 usec  
PL1 -1.00 dB  
PL1W 13.28156662 W  
SFO1 300.1318534 MHz  
SI 32768  
SF 300.1300131 MHz  
WDW EM  
SSB 0  
LB 0.30 Hz  
GB 0  
PC 1.00

172.66  
139.52  
134.73  
133.87  
132.31  
130.86  
129.56  
129.19  
128.48  
128.41  
122.68  
77.40  
76.97  
76.55

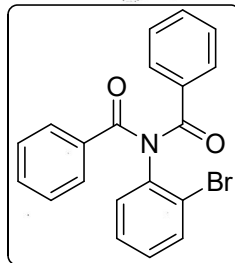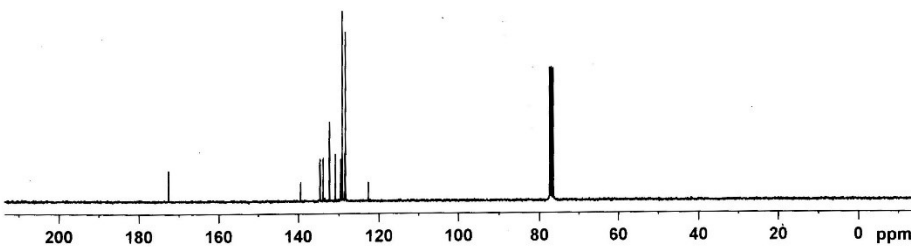

<sup>13</sup>C NMR (75 MHz) Spectrum of compound **2g**

NAME RA-NL-1-259A  
EXPNO 2  
PROCNO 1  
Date\_ 20190718  
Time 16.10  
INSTRUM spect  
PROBHD 5 mm DUL 13C-1  
PULPROG zgpg30  
TD 65536  
SOLVENT CDCl3  
NS 874  
DS 4  
SWH 17985.611 Hz  
FIDRES 0.274439 Hz  
AQ 1.8219508 sec  
RG 7298.2  
DW 27.800 usec  
DE 6.50 usec  
TE 300.0 K  
D1 2.00000000 sec  
D11 0.03000000 sec  
TD0 1

===== CHANNEL f1 =====  
NUC1 13C  
P1 10.68 usec  
PL1 0.00 dB  
PL1W 31.39858055 W  
SFO1 75.4752953 MHz

===== CHANNEL f2 =====  
CPDPRG2 waltz16  
NUC2 1H  
PCPD2 80.00 usec  
PL2 -1.00 dB  
PL12 15.48 dB  
PL13 16.00 dB  
PL2W 13.28156662 W  
PL12W 0.29870972 W  
PL13W 0.26500207 W  
SFO2 300.1312005 MHz  
SI 32768  
SF 75.467490 MHz  
WDW EM  
SSB 0  
LB 1.00 Hz  
GB 0  
PC 1.40

Item name: MSR-2A-380  
Item description:

Channel name: Low energy : Time 0.2863 +/- 0.0657 minutes

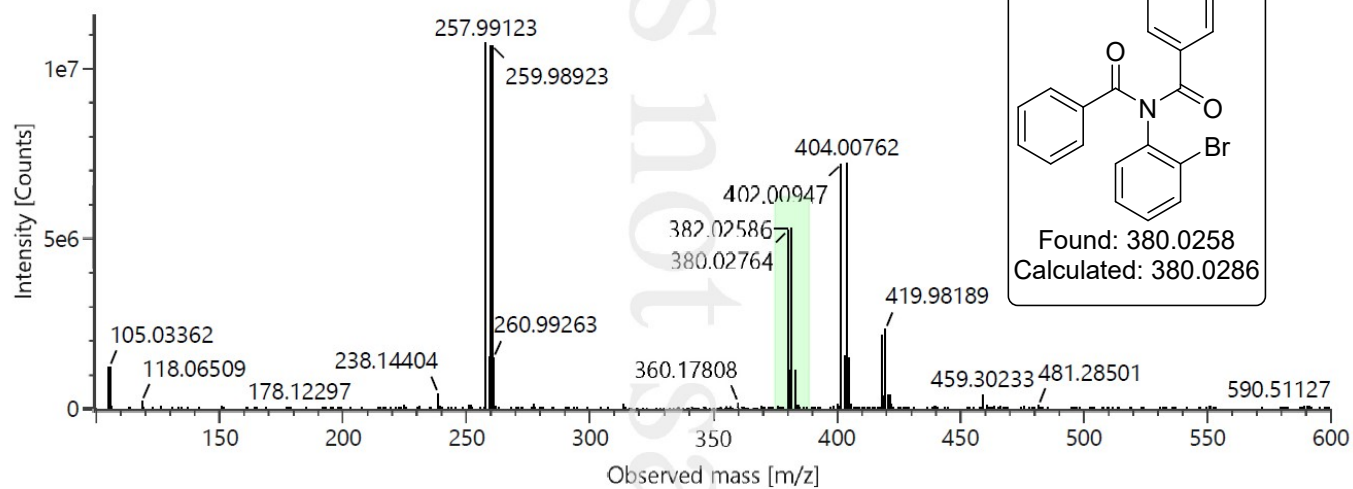

HRMS Spectrum of compound 2g

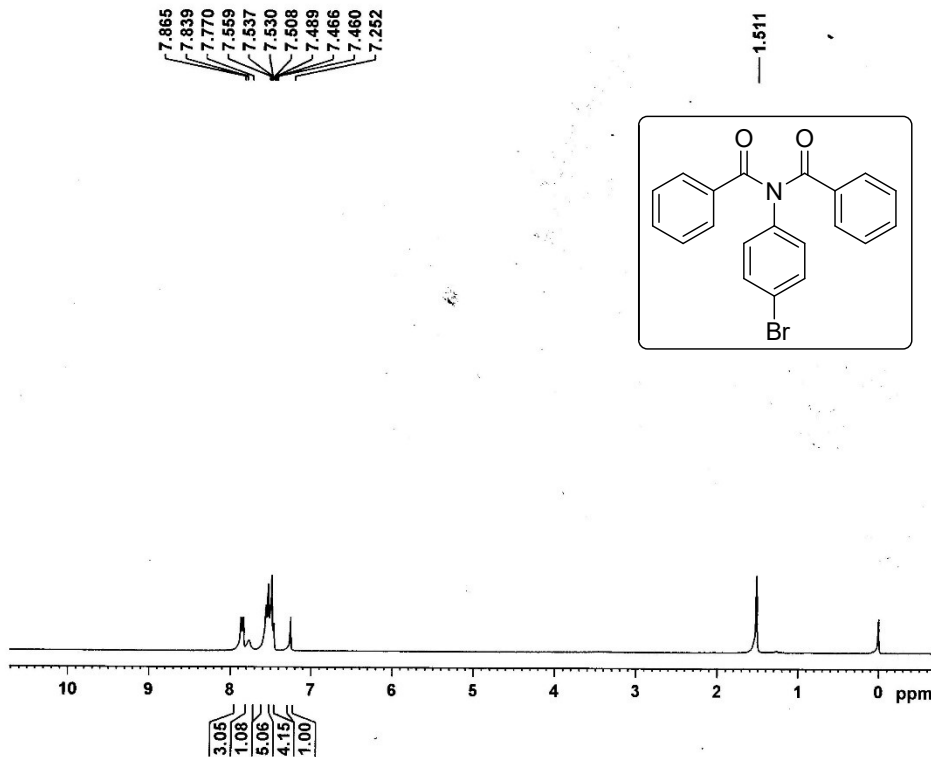

NAME RA-NL-4-50A  
EXPNO 2  
PROCNO 1  
Date\_ 20211101  
Time 9.58  
INSTRUM spect  
PROBHD 5 mm DUL 13C-1  
PULPROG zg30  
TD 65536  
SOLVENT CDCl3  
NS 16  
DS 2  
SWH 6172.838 Hz  
FIDRES 0.094190 Hz  
AQ 5.3084660 sec  
RG 574.7  
DW 81.000 usec  
DE 6.50 usec  
TE 300.0 K  
D1 1.00000000 sec  
TDD 1

===== CHANNEL f1 =====  
NUC1 1H  
P1 14.00 usec  
PL1 -2.00 dB  
PL1W 16.72050095 W  
SFO1 300.1318534 MHz  
SI 32768  
SF 300.1300087 MHz  
WDW EM  
SSB 0  
LB 0.30 Hz  
GB 0  
PC 1.00

<sup>1</sup>H NMR (300 MHz) Spectrum of compound **2h**

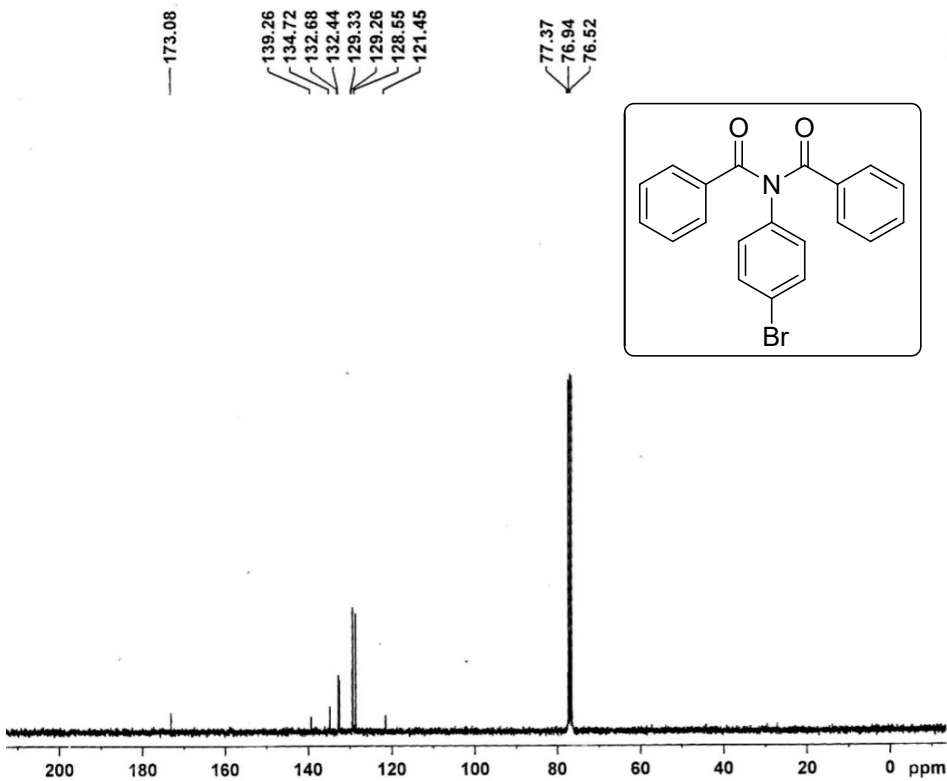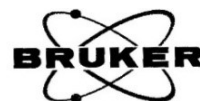

NAME RA-NL-2-4(1A)  
EXPNO 2  
PROCNO 1  
Date\_ 20190926  
Time 23.57  
INSTRUM spect  
PROBHD 5 mm DUL 13C-1  
PULPROG zgpg30  
TD 65536  
SOLVENT CDCl3  
NS 604  
DS 4  
SWH 17985.611 Hz  
FIDRES 0.274439 Hz  
AQ 1.8219508 sec  
RG 2298.8  
DW 27.800 usec  
DE 6.50 usec  
TE 300.0 K  
D1 2.00000000 sec  
D11 0.03000000 sec  
TDD 1

===== CHANNEL f1 =====  
NUC1 13C  
P1 10.68 usec  
PL1 0.00 dB  
PL1W 31.39858055 W  
SFO1 75.4752953 MHz

===== CHANNEL f2 =====  
CPDPRG2 waltz16  
NUC2 1H  
PCPD2 80.00 usec  
PL2 -1.00 dB  
PL12 15.48 dB  
PL13 16.00 dB  
PL2W 13.28156662 W  
PL12W 0.29870972 W  
PL13W 0.26500207 W  
SFO2 300.1312005 MHz  
SI 32768  
SF 75.4677490 MHz  
WDW EM  
SSB 0  
LB 1.00 Hz  
GB 0  
PC 1.40

<sup>13</sup>C NMR (75 MHz) Spectrum of compound **2h**

8.031  
8.007  
7.633  
7.608  
7.559  
7.532  
7.399  
7.375  
7.352  
7.279  
7.254  
7.227  
7.219  
7.191

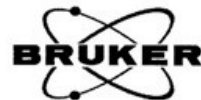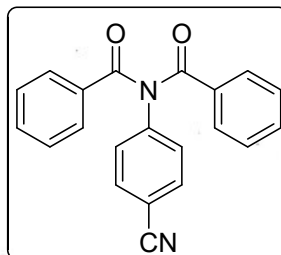

NAME RA-NL-1-225A  
EXPNO 5  
PROCNO 1  
Date 20190711  
Time 15.23  
INSTRUM spect  
PROBHD 5 mm DUL 13C-1  
PULPROG zg30  
TD 65536  
SOLVENT CDCl3  
NS 16  
DS 2  
SWH 6172.839 Hz  
FIDRES 0.094190 Hz  
AQ 5.3084660 sec  
RG 128  
DW 81.000 usec  
DE 6.50 usec  
TE 300.0 K  
D1 1.00000000 sec  
TDO 1

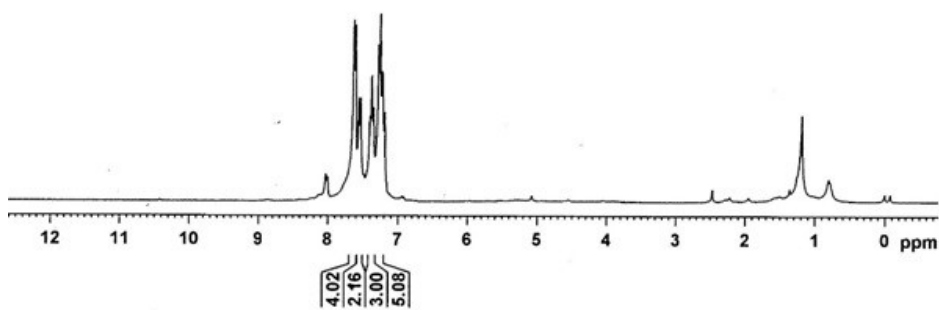

===== CHANNEL f1 =====  
NUC1 1H  
P1 12.00 usec  
PL1 -1.00 dB  
PL1W 13.28156662 W  
SFO1 300.1318534 MHz  
SI 32768  
SF 300.1300336 MHz  
WDW EM  
SSB 0  
LB 0.30 Hz  
GB 0  
PC 1.00

<sup>1</sup>H NMR (300 MHz) Spectrum of compound **2i**

172.87  
144.35  
134.39  
133.27  
132.84  
129.30  
128.71  
128.27  
117.89  
111.29  
77.42  
77.00  
76.58

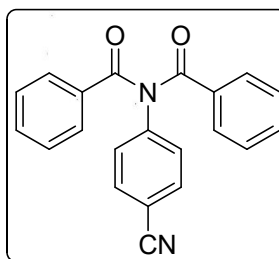

NAME RA-NL-1-225A  
EXPNO 6  
PROCNO 1  
Date 20190711  
Time 16.32  
INSTRUM spect  
PROBHD 5 mm DUL 13C-1  
PULPROG zgpg30  
TD 65536  
SOLVENT CDCl3  
NS 1024  
DS 4  
SWH 17985.611 Hz  
FIDRES 0.274439 Hz  
AQ 1.8219508 sec  
RG 2580.3  
DW 27.800 usec  
DE 6.50 usec  
TE 300.0 K  
D1 2.00000000 sec  
D11 0.03000000 sec  
TDO 1

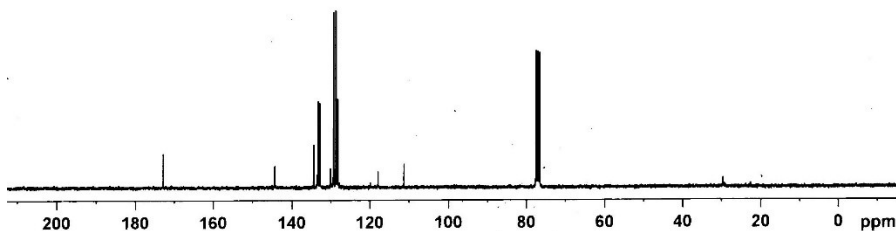

===== CHANNEL f1 =====  
NUC1 13C  
P1 10.68 usec  
PL1 0.00 dB  
PL1W 31.39858055 W  
SFO1 75.4752953 MHz  
===== CHANNEL f2 =====  
CPDPRG2 waltz16  
NUC2 1H  
PCPD2 80.00 usec  
PL2 -1.00 dB  
PL12 15.48 dB  
PL13 16.00 dB  
PL2W 13.28156662 W  
PL12W 0.29870972 W  
PL13W 0.26500207 W  
SFO2 300.1312005 MHz  
SI 32768  
SF 75.4677480 MHz  
WDW EM  
SSB 0  
LB 1.00 Hz  
GB 0  
PC 1.40

<sup>13</sup>C NMR (75 MHz) Spectrum of compound **2i**



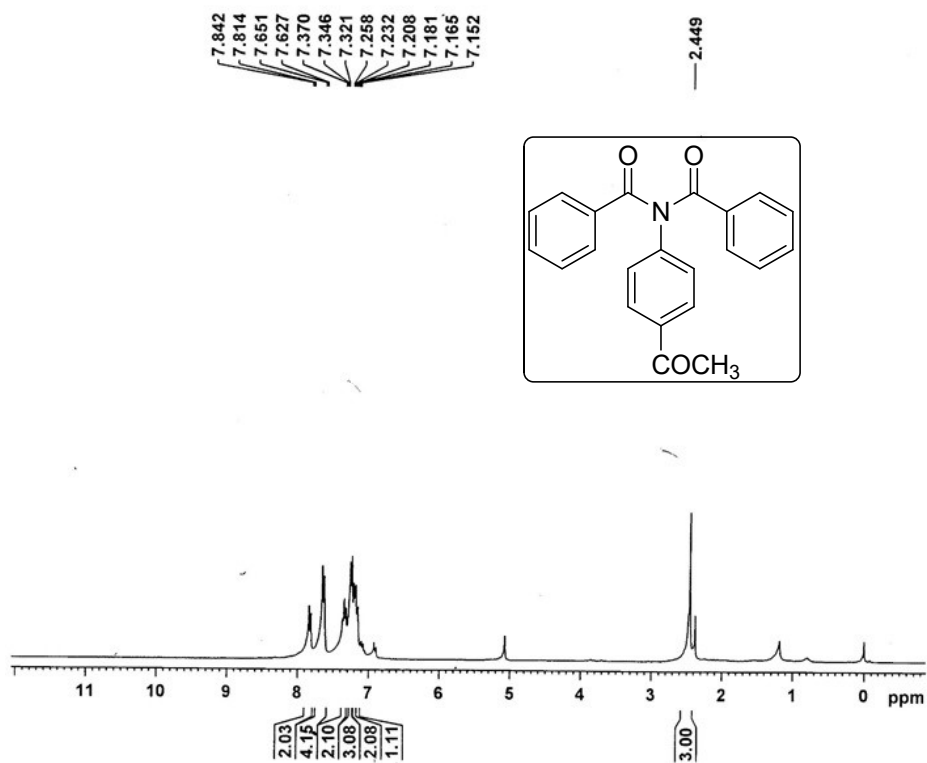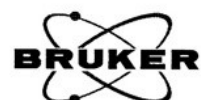

NAME RA-NL-1-299  
EXPNO 7  
PROCNO 1  
Date\_ 20190817  
Time 18.08  
INSTRUM spect  
PROBHD 5 mm DUL 13C-1  
PULPROG zg30  
TD 65536  
SOLVENT CDCl3  
NS 16  
DS 2  
SWH 6172.839 Hz  
FIDRES 0.094190 Hz  
AQ 5.3084660 sec  
RG 90.5  
DW 81.000 usec  
DE 6.50 usec  
TE 300.0 K  
D1 1.00000000 sec  
TD0 1

===== CHANNEL f1 =====  
NUC1 1H  
P1 12.00 usec  
PL1 -1.00 dB  
PL1W 13.28156662 W  
SFO1 300.1318534 MHz  
SI 32768  
SF 300.1300346 MHz  
WDW EM  
SSB 0  
LB 0.30 Hz  
GB 0  
PC 1.00

<sup>1</sup>H NMR (300 MHz) Spectrum of compound **2j**

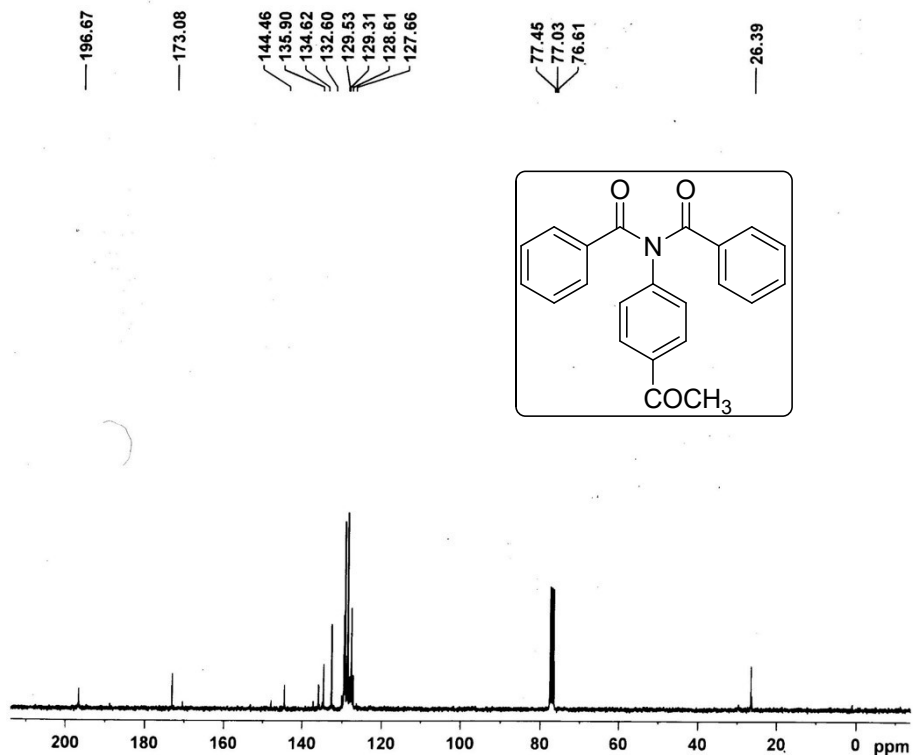

NAME RA-NL-1-299  
EXPNO 6  
PROCNO 1  
Date\_ 20190817  
Time 18.03  
INSTRUM spect  
PROBHD 5 mm DUL 13C-1  
PULPROG zgpg30  
TD 65536  
SOLVENT CDCl3  
NS 753  
DS 4  
SWH 17935.611 Hz  
FIDRES 0.274439 Hz  
AQ 1.8219508 sec  
RG 2896.3  
DW 27.800 usec  
DE 6.50 usec  
TE 300.0 K  
D1 2.00000000 sec  
D11 0.03000000 sec  
TD0 1

===== CHANNEL f1 =====  
NUC1 13C  
P1 10.68 usec  
PL1 0.00 dB  
PL1W 31.39858055 W  
SFO1 75.4752953 MHz

===== CHANNEL f2 =====  
CPDPRG2 waltz16  
NUC2 1H  
PCPD2 80.00 usec  
PL2 -1.00 dB  
PL12 15.48 dB  
PL13 16.00 dB  
PL2W 13.28156662 W  
PL12W 0.29870972 W  
PL13W 0.26500207 W  
SFO2 300.1312005 MHz  
SI 32768  
SF 75.4677490 MHz  
WDW EM  
SSB 0  
LB 1.00 Hz  
GB 0  
PC 1.40

<sup>13</sup>C NMR (75 MHz) Spectrum of compound **2j**

8.135  
8.125  
8.108  
7.839  
7.726  
7.702  
7.697  
7.546  
7.540  
7.533  
7.528  
7.524  
7.486  
7.471  
7.466  
7.446  
7.422  
7.359  
7.333  
7.320  
7.314  
7.309  
7.293  
7.281  
7.252  
7.223  
7.198  
7.180  
7.175

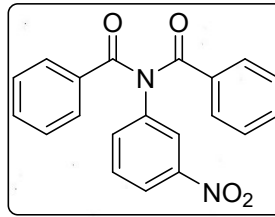

NAME RA-NL-4-51C  
EXPNO 1  
PROCNO 1  
Date\_ 20211027  
Time 16.19  
INSTRUM spect  
PROBHD 5 mm DUL 13C-1  
PULPROG zg30  
TD 65536  
SOLVENT CDCl3  
NS 16  
DS 2  
SWH 6172.839 Hz  
FIDRES 0.094190 Hz  
AQ 5.308460 sec  
RG 256  
DW 81.000 usec  
DE 6.50 usec  
TE 300.0 K  
D1 1.0000000 sec  
D0 1

CHANNEL f1  
NUC1 1H  
P1 14.00 usec  
PL1 -2.00 dB  
PL1W 16.72050095 W  
SFO1 300.1318534 MHz  
SI 32768  
SF 300.1300091 MHz  
WDW EM  
SSB 0  
LB 0.30 Hz  
GB 0  
PC 1.00

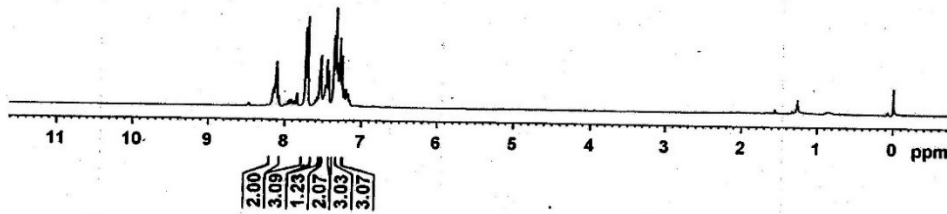

<sup>1</sup>H NMR (300 MHz) Spectrum of compound **2k**

172.93  
148.96  
134.44  
133.74  
132.81  
130.13  
129.30  
128.71  
127.09  
122.97  
122.38  
77.38  
76.96  
76.54

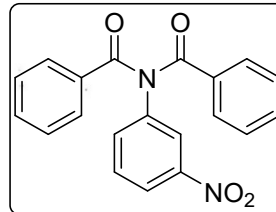

NAME RA-NL-1-276  
EXPNO 3  
PROCNO 1  
Date\_ 20190801  
Time 23.51  
INSTRUM spect  
PROBHD 5 mm DUL 13C-1  
PULPROG zgpg30  
TD 65536  
SOLVENT CDCl3  
NS 1671  
DS 4  
SWH 17985.611 Hz  
FIDRES 0.274439 Hz  
AQ 1.8219508 sec  
RG 4597.6  
DW 27.800 usec  
DE 6.50 usec  
TE 300.0 K  
D1 2.00000000 sec  
D11 0.03000000 sec  
D0 1

CHANNEL f1  
NUC1 13C  
P1 10.68 usec  
PL1 0.00 dB  
PL1W 31.39858055 W  
SFO1 75.4752953 MHz

CHANNEL f2  
CPDPRG2 waltz16  
NUC2 1H  
PCPD2 80.00 usec  
PL2 -1.00 dB  
PL12 15.48 dB  
PL13 16.00 dB  
PL2W 13.28156662 W  
PL12W 0.29870972 W  
PL13W 0.26500207 W  
SFO2 300.1312005 MHz  
SI 32768  
SF 75.4677490 MHz  
WDW EM  
SSB 0  
LB 1.00 Hz  
GB 0  
PC 1.40

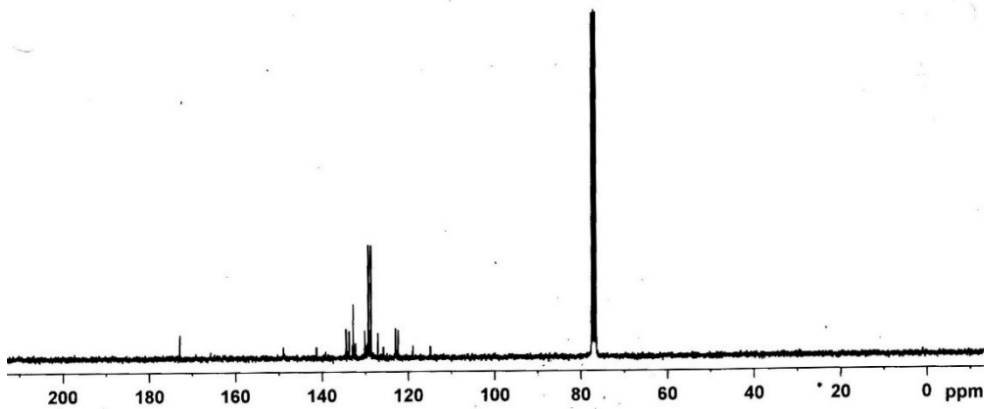

<sup>13</sup>C NMR (75 MHz) Spectrum of compound **2k**

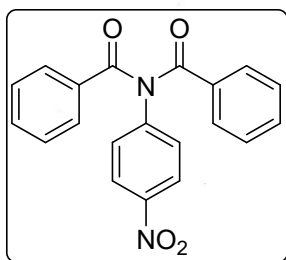

8.255  
8.225  
8.155  
8.130  
7.756  
7.732  
7.633  
7.608  
7.521  
7.496  
7.471  
7.399  
7.378  
7.349  
7.288  
7.278

NAME RA-NL-1-267A  
EXPNO 1  
PROCNO 1  
Date\_ 20201022  
Time 22.38  
INSTRUM spect  
PROBHD 5 mm DUL 13C-1  
PULPROG zg30  
TD 65536  
SOLVENT CDCl3  
NS 16  
DS 2  
SWH 6172.839 Hz  
FIDRES 0.094190 Hz  
AQ 5.3084660 sec  
RG 574.7  
DW 81.000 usec  
DE 6.50 usec  
TE 300.0 K  
D1 1.0000000 sec  
TD0 1

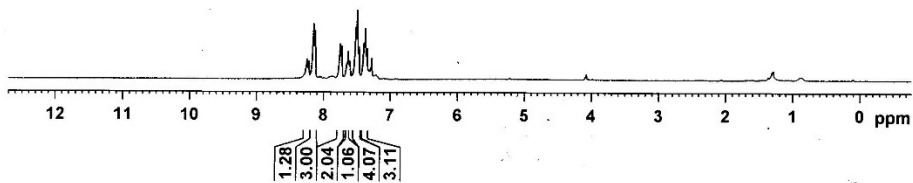

<sup>1</sup>H NMR (300 MHz) Spectrum of compound 2I

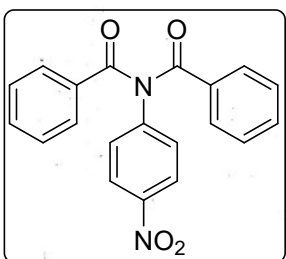

172.88  
145.85  
133.67  
132.96  
130.21  
129.36  
128.78  
128.46  
124.82  
77.40  
76.97  
76.55

NAME RA-NL-1-267A  
EXPNO 2  
PROCNO 1  
Date\_ 20201110  
Time 7.00  
INSTRUM spect  
PROBHD 5 mm DUL 13C-1  
PULPROG zgpg30  
TD 65536  
SOLVENT CDCl3  
NS 7000  
DS 4  
SWH 17985.611 Hz  
FIDRES 0.274439 Hz  
AQ 1.8219508 sec  
RG 4597.6  
DW 27.800 usec  
DE 6.50 usec  
TE 300.0 K  
D1 2.0000000 sec  
D11 0.0300000 sec  
TD0 1

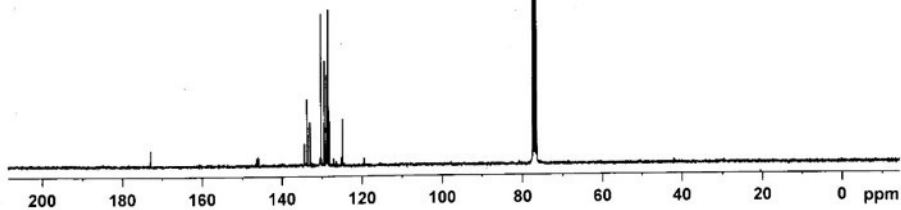

===== CHANNEL f1 =====  
NUC1 13C  
P1 12.75 usec  
PL1 -1.00 dB  
PL1W 39.52846909 W  
SFO1 75.4752953 MHz  
  
===== CHANNEL f2 =====  
CPDPRG2 waltz16  
NUC2 1H  
PCPD2 80.00 usec  
PL2 -1.00 dB  
PL12 14.46 dB  
PL13 16.00 dB  
PL2W 13.28156662 W  
PL12W 0.37778899 W  
PL13W 0.26500207 W  
SFO2 300.1312005 MHz  
SI 32768  
SF 75.4677460 MHz  
WDW EM  
SSB 0  
LB 1.00 Hz  
GB 0  
PC 1.40

<sup>13</sup>C NMR (75 MHz) Spectrum of compound 2I

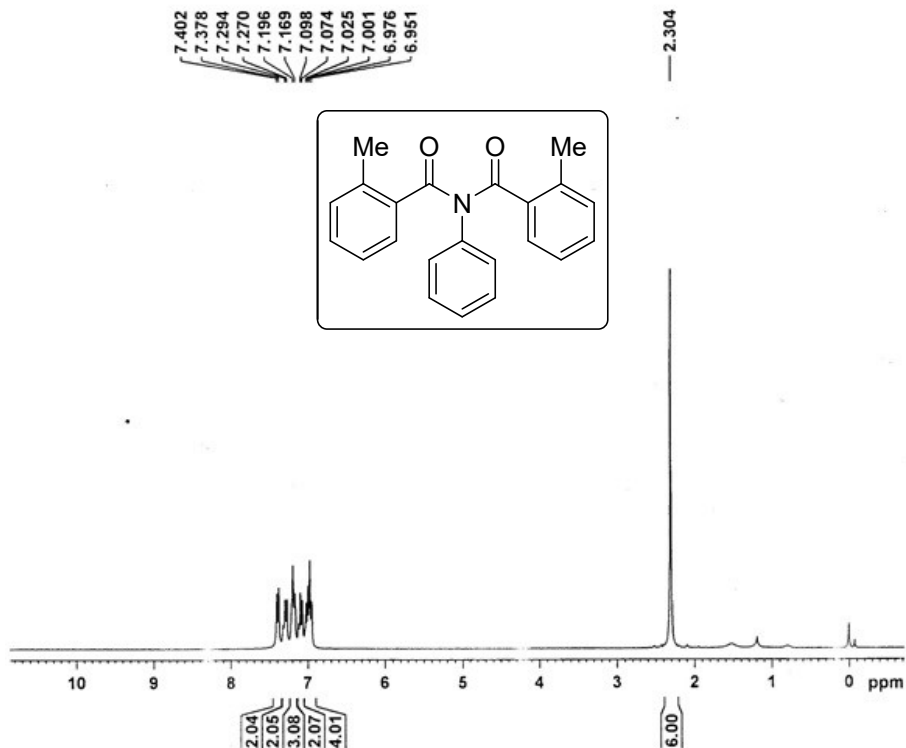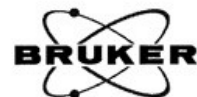

NAME RA-NL-2-43A  
 EXPNO 2  
 PROCNO 1  
 Date\_ 20191019  
 Time 13.59  
 INSTRUM spect  
 PROBHD 5 mm DUL 13C-1  
 PULPROG zg30  
 TD 65536  
 SOLVENT CDCl3  
 NS 16  
 DS 2  
 SWH 6172.839 Hz  
 FIDRES 0.094190 Hz  
 AQ 5.3084660 sec  
 RG 161.3  
 DW 81.000 usec  
 DE 6.50 usec  
 TE 300.0 K  
 D1 1.00000000 sec  
 TD0 1

===== CHANNEL f1 =====  
 NUC1 1H  
 P1 12.00 usec  
 PL1 -1.00 dB  
 PL1W 13.28156662 W  
 SFO1 300.1318534 MHz  
 SI 32768  
 SF 300.1300366 MHz  
 WDW EM  
 SSB 0  
 LB 0.30 Hz  
 GB 0  
 PC 1.00

<sup>1</sup>H NMR (300 MHz) Spectrum of compound 4a

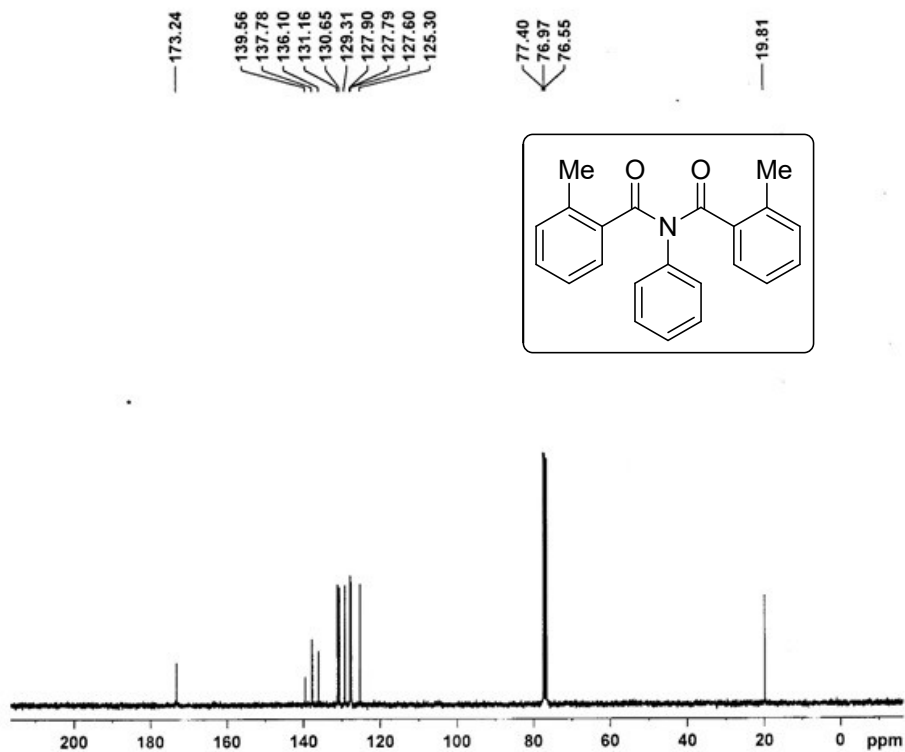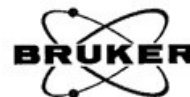

NAME RA-NL-2-43A  
 EXPNO 1  
 PROCNO 1  
 Date\_ 20191019  
 Time 13.51  
 INSTRUM spect  
 PROBHD 5 mm DUL 13C-1  
 PULPROG zgpg30  
 TD 65536  
 SOLVENT CDCl3  
 NS 506  
 DS 4  
 SWH 17985.611 Hz  
 FIDRES 0.274439 Hz  
 AQ 1.8219508 sec  
 RG 3649.1  
 DW 27.800 usec  
 DE 6.50 usec  
 TE 300.0 K  
 D1 2.00000000 sec  
 D11 0.03000000 sec  
 TD0 1

===== CHANNEL f1 =====  
 NUC1 13C  
 P1 10.88 usec  
 PL1 0.00 dB  
 PL1W 31.39858055 W  
 SFO1 75.4752953 MHz

===== CHANNEL f2 =====  
 CPDPRG2 waltz16  
 NUC2 1H  
 PCPD2 80.00 usec  
 PL2 -1.00 dB  
 PL12 15.48 dB  
 PL13 16.00 dB  
 PL2W 13.28156662 W  
 PL12W 0.28870972 W  
 PL13W 0.26500207 W  
 SFO2 300.1312005 MHz  
 SI 32788  
 SF 75.4677490 MHz  
 WDW EM  
 SSB 0  
 LB 1.00 Hz  
 GB 0  
 PC 1.40

<sup>13</sup>C NMR (75 MHz) Spectrum of compound 4a

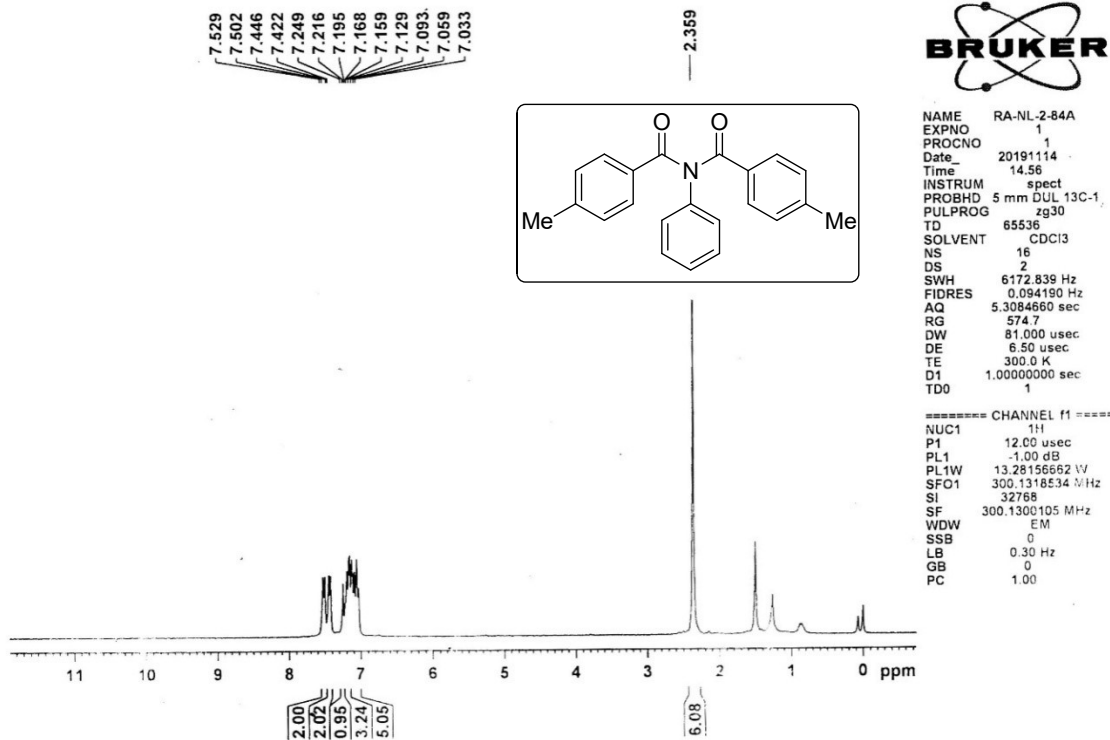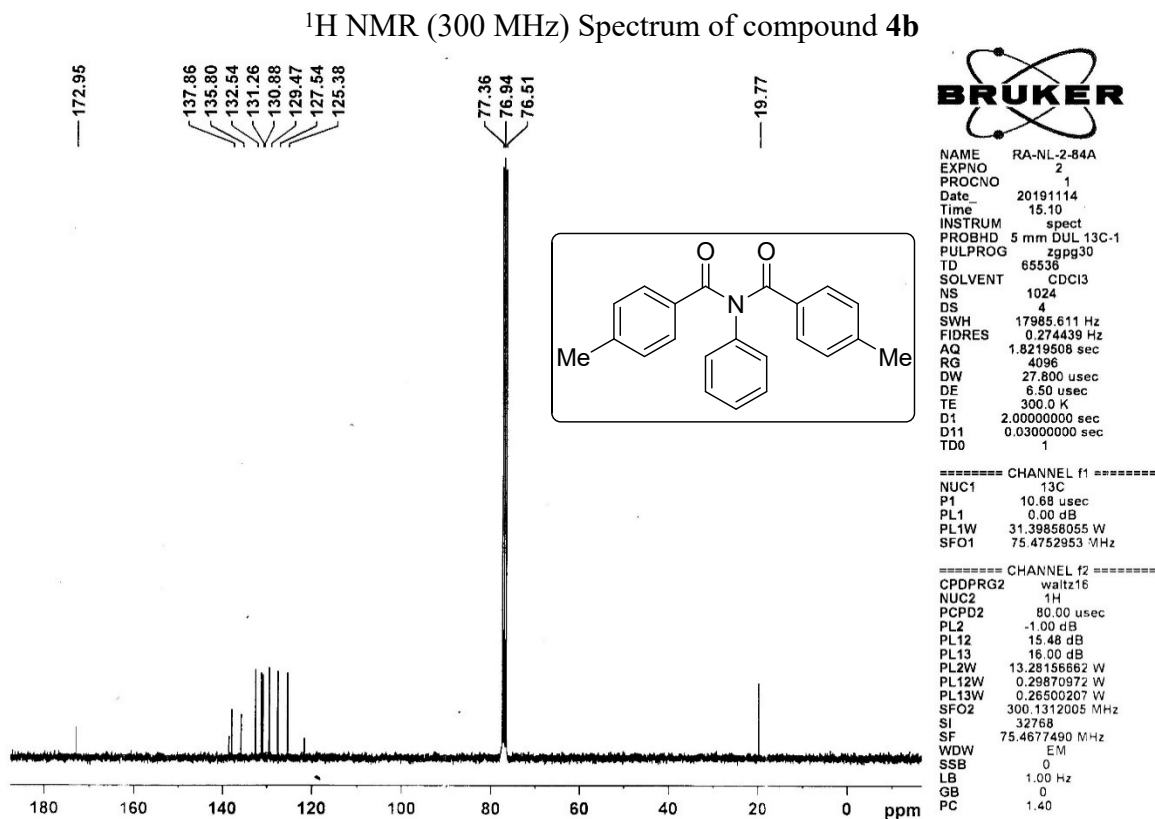

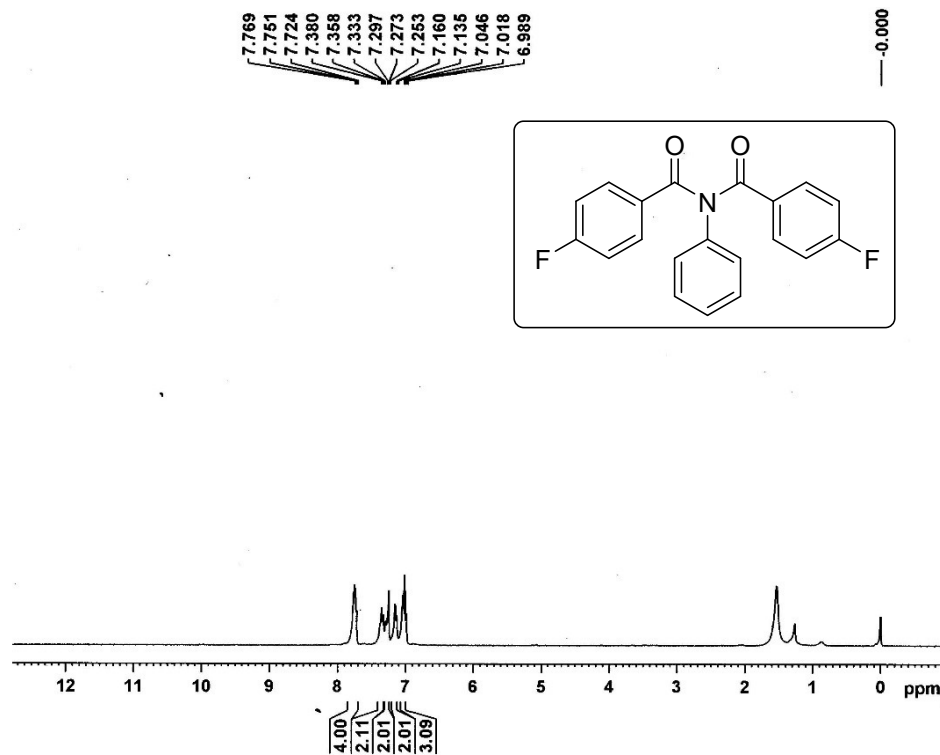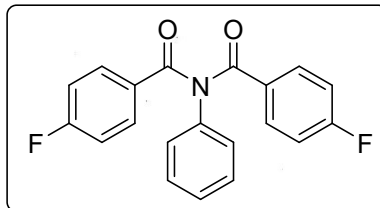

NAME RA-NL-4-56  
EXPNO 5  
PROCNO 1  
Date\_ 20211125  
Time 15.53  
INSTRUM spect  
PROBHD 5 mm DUL 13C-1  
PULPROG zg30  
TD 65536  
SOLVENT CDCl3  
NS 16  
DS 2  
SWH 6172.839 Hz  
FIDRES 0.094190 Hz  
AQ 5.3084660 sec  
RG 456.1  
DW 81.000 usec  
DE 6.50 usec  
TE 300.0 K  
D1 1.00000000 sec  
TDO 1

===== CHANNEL f1 =====  
NUC1 1H  
P1 14.00 usec  
PL1 -2.00 dB  
PL1W 16.72050095 W  
SFO1 300.1318534 MHz  
SI 32768  
SF 300.1300089 MHz  
WDW EM  
SSB 0  
LB 0.30 Hz  
GB 0  
PC 1.00

<sup>1</sup>H NMR (300 MHz) Spectrum of compound 4c

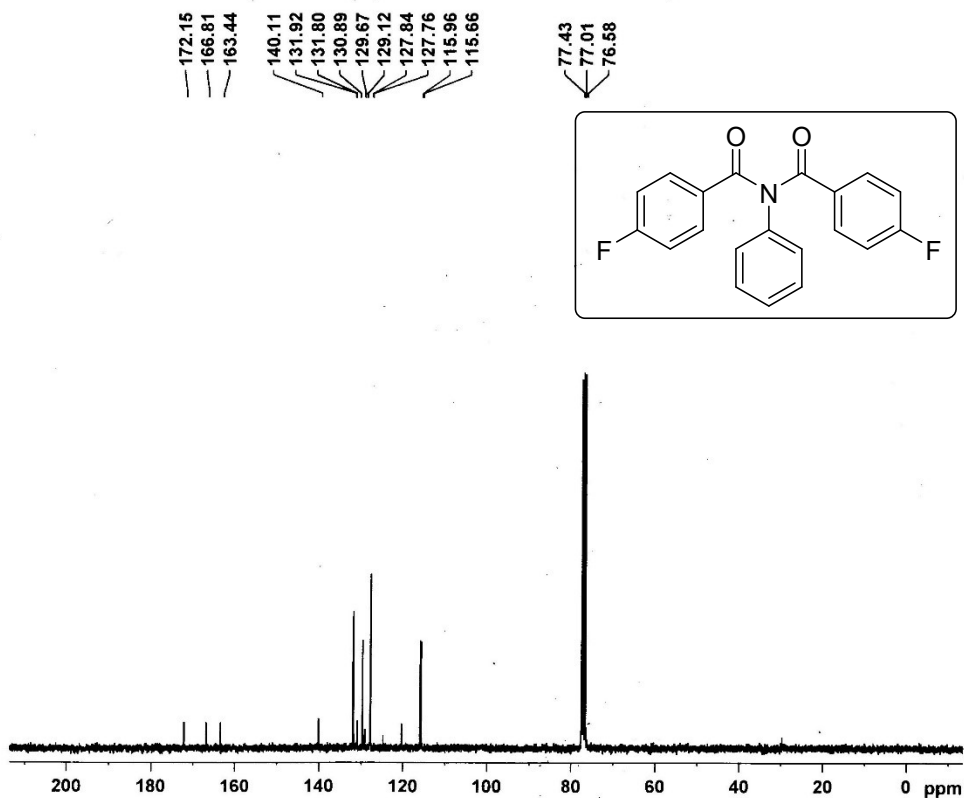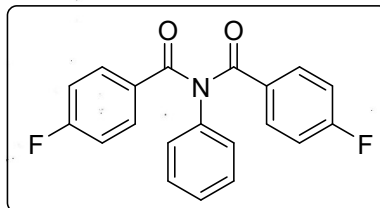

NAME RA-NL-2-352D  
EXPNO 2  
PROCNO 1  
Date\_ 20210713  
Time 21.29  
INSTRUM spect  
PROBHD 5 mm DUL 13C-1  
PULPROG zgpg30  
TD 65536  
SOLVENT CDCl3  
NS 1144  
DS 4  
SWH 17985.611 Hz  
FIDRES 0.274439 Hz  
AQ 1.8219508 sec  
RG 2298.8  
DW 27.800 usec  
DE 6.50 usec  
TE 300.0 K  
D1 2.00000000 sec  
D11 0.03000000 sec  
TDO 1

===== CHANNEL f1 =====  
NUC1 13C  
P1 12.75 usec  
PL1 -1.00 dB  
PL1W 39.52846909 W  
SFO1 75.4752953 MHz

===== CHANNEL f2 =====  
CPDPRG2 waltz16  
NUC2 1H  
PCPD2 80.00 usec  
PL2 -1.00 dB  
PL12 14.46 dB  
PL13 16.00 dB  
PL2W 13.28156662 W  
PL12W 0.37778899 W  
PL13W 0.26500207 W  
SFO2 300.1312005 MHz  
SI 32768  
SF 75.4677453 MHz  
WDW EM  
SSB 0  
LB 1.00 Hz  
GB 0  
PC 1.40

<sup>13</sup>C NMR (75 MHz) Spectrum of compound 4c

7.692  
7.577  
7.561  
7.427  
7.400  
7.367  
7.342  
7.310  
7.289  
7.263  
7.249  
7.237  
7.163  
7.139

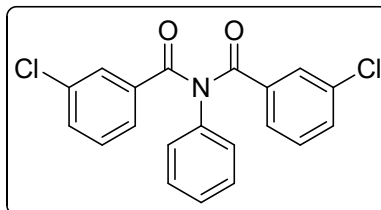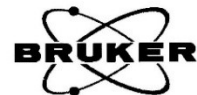

NAME RA-NL-2-125A  
EXPNO 2  
PROCNO 1  
Date\_ 20191212  
Time 15.20  
INSTRUM spect  
PROBHD 5 mm DUL 13C-1  
PULPROG zg30  
TD 65536  
SOLVENT CDCl3  
NS 16  
DS 2  
SWH 6172.839 Hz  
FIDRES 0.094190 Hz  
AQ 5.3084660 sec  
RG 322.5  
DW 81.000 usec  
DE 6.50 usec  
TE 300.0 K  
D1 1.0000000 sec  
TD0 1

===== CHANNEL f1 =====  
NUC1 1H  
P1 12.00 usec  
PL1 -1.00 dB  
PL1W 13.28156662 W  
SFO1 300.1318534 MHz  
SI 32768  
SF 300.1300097 MHz  
WDW EM  
SSB 0  
LB 0.30 Hz  
GB 0  
PC 1.00

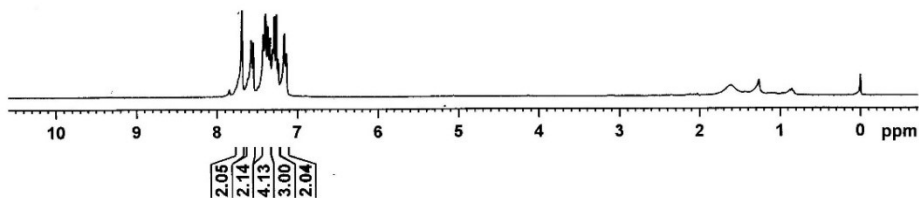

<sup>1</sup>H NMR (300 MHz) Spectrum of compound 4d

171.77  
139.45  
136.36  
134.82  
132.36  
129.74  
129.70  
129.30  
128.12  
127.83  
127.08  
77.38  
76.95  
76.53

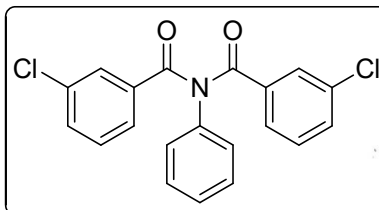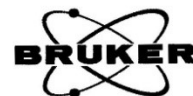

NAME RA-NL-2-125A  
EXPNO 3  
PROCNO 1  
Date\_ 20191212  
Time 16.27  
INSTRUM spect  
PROBHD 5 mm DUL 13C-1  
PULPROG zgpg30  
TD 65536  
SOLVENT CDCl3  
NS 1024  
DS 4  
SWH 17985.611 Hz  
FIDRES 0.274439 Hz  
AQ 1.8219508 sec  
RG 9195.2  
DW 27.800 usec  
DE 6.50 usec  
TE 300.0 K  
D1 2.0000000 sec  
D11 0.03000000 sec  
TD0 1

===== CHANNEL f1 =====  
NUC1 13C  
P1 10.68 usec  
PL1 0.00 dB  
PL1W 31.39858055 W  
SFO1 75.4752953 MHz  
===== CHANNEL f2 =====  
CPDPRG2 waltz16  
NUC2 1H  
PCPD2 80.00 usec  
PL2 -1.00 dB  
PL12 15.48 dB  
PL13 16.00 dB  
PL2W 13.28156662 W  
PL12W 0.29870972 W  
PL13W 0.26500207 W  
SFO2 300.1312005 MHz  
SI 32768  
SF 75.4677490 MHz  
WDW EM  
SSB 0  
LB 1.00 Hz  
GB 0  
PC 1.40

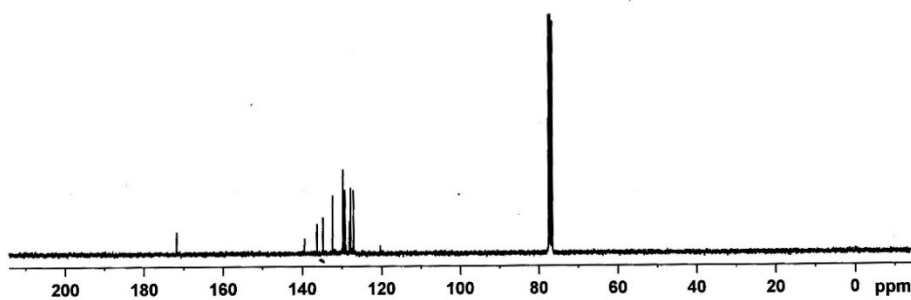

<sup>13</sup>C NMR (75 MHz) Spectrum of compound 4d

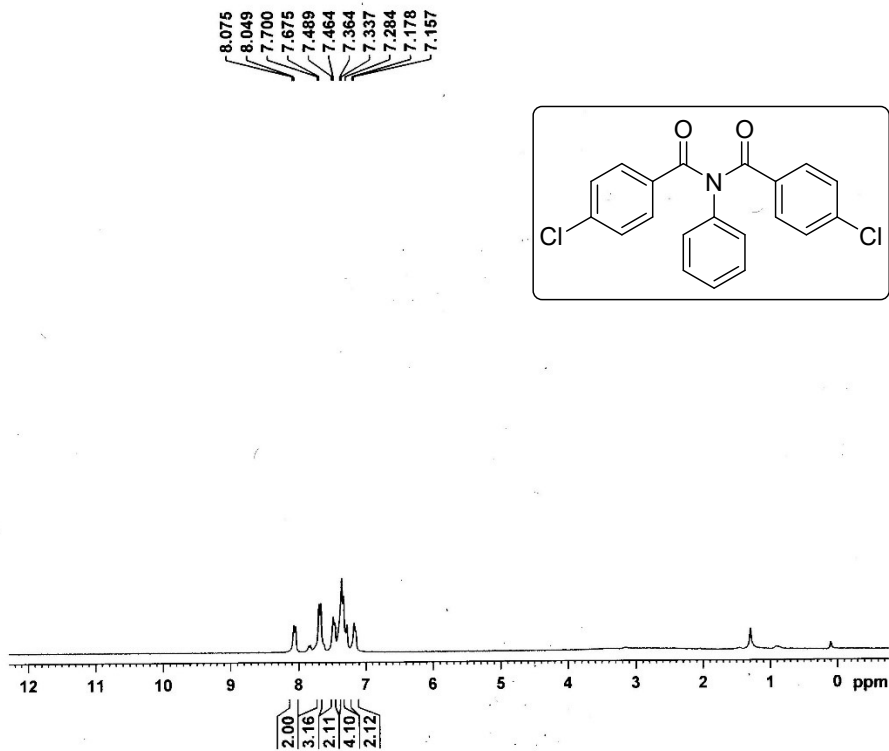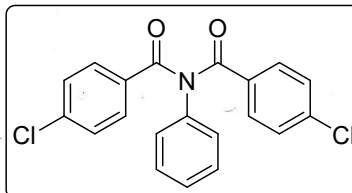

NAME RA-NL-2-344A  
EXPNO 1  
PROCNO 1  
Date 20201021  
Time 12.43  
INSTRUM spect  
PROBHD 5 mm DUL 13C-1  
PULPROG zg30  
TD 65536  
SOLVENT CDCl3  
NS 16  
DS 2  
SWH 6172.839 Hz  
FIDRES 0.094190 Hz  
AQ 5.3084680 sec  
RG 812.7  
DW 81.000 usec  
DE 6.50 usec  
TE 300.0 K  
D1 1.00000000 sec  
TD0 1

===== CHANNEL f1 =====  
NUC1 1H  
P1 13.50 usec  
PL1 -1.00 dB  
PL1W 13.28156662 W  
SFO1 300.1318534 MHz  
SI 32768  
SF 300.1300011 MHz  
WDW EM  
SSB 0  
LB 0.30 Hz  
GB 0  
PC 1.00

<sup>1</sup>H NMR (300 MHz) Spectrum of compound 4e

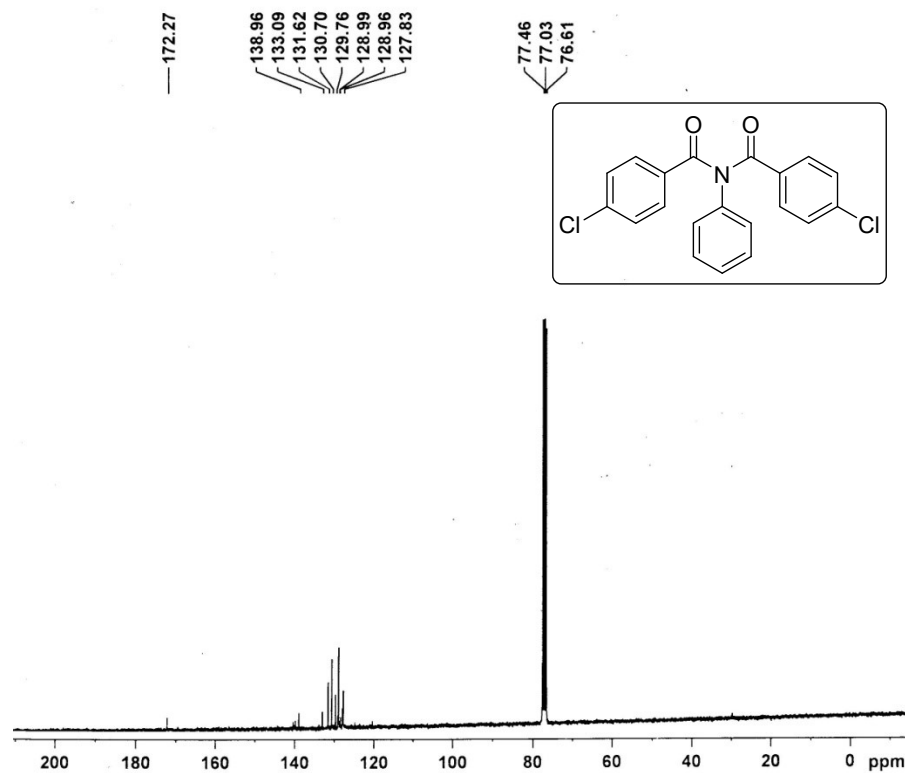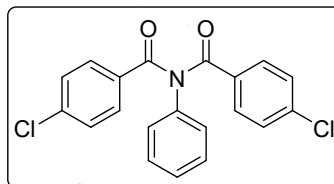

NAME RA-NL-2-344  
EXPNO 1  
PROCNO 1  
Date 20201105  
Time 10.10  
INSTRUM spect  
PROBHD 5 mm DUL 13C-1  
PULPROG zgpg30  
TD 65536  
SOLVENT CDCl3  
NS 4000  
DS 4  
SWH 17985.611 Hz  
FIDRES 0.274439 Hz  
AQ 1.8219508 sec  
RG 3251  
DW 27.800 usec  
DE 6.50 usec  
TE 300.0 K  
D1 2.00000000 sec  
D11 0.03000000 sec  
TD0 1

===== CHANNEL f1 =====  
NUC1 13C  
P1 12.75 usec  
PL1 -1.00 dB  
PL1W 39.52846909 W  
SFO1 75.4752953 MHz

===== CHANNEL f2 =====  
CPDPRG2 waltz16  
NUC2 1H  
PCPD2 80.00 usec  
PL2 -1.00 dB  
PL12 14.46 dB  
PL13 16.00 dB  
PL2W 13.28156662 W  
PL12W 0.37778899 W  
PL13W 0.28500207 W  
SFO2 300.1312005 MHz  
SI 32768  
SF 75.4677414 MHz  
WDW EM  
SSB 0  
LB 1.00 Hz  
GB 0  
PC 1.40

<sup>13</sup>C NMR (75 MHz) Spectrum of compound 4e



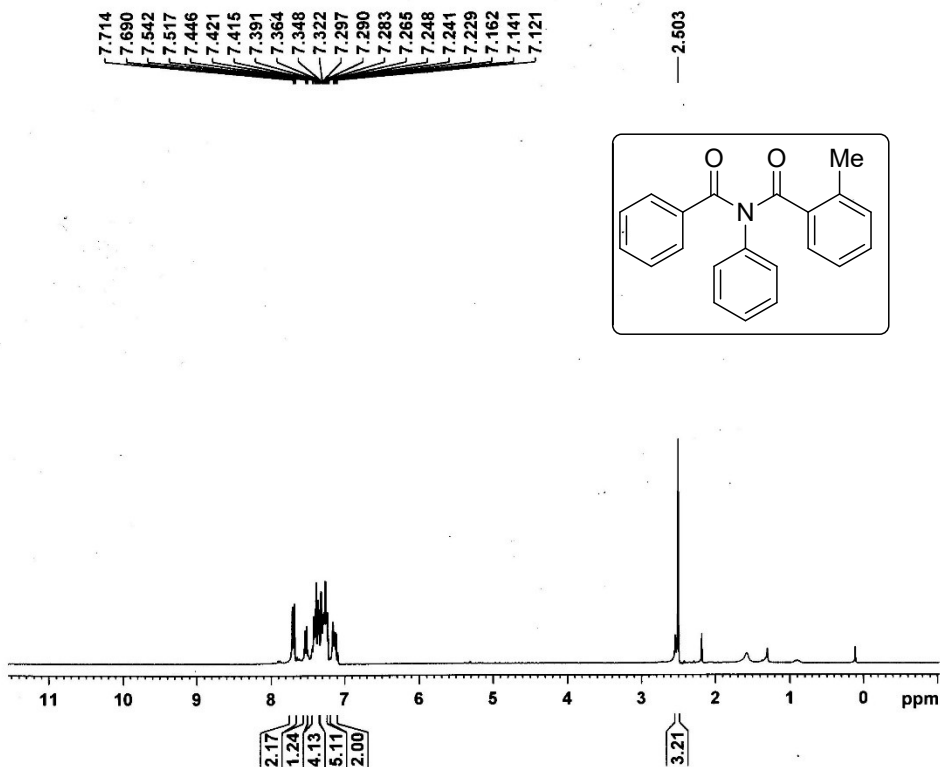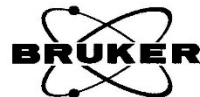

NAME RA-NL-2-139  
EXPNO 1  
PROCNO 1  
Date\_ 20200109  
Time 21.22  
INSTRUM spect  
PROBHD 5 mm DUL 13C-1  
PULPROG zg30  
TD 65536  
SOLVENT CDCl3  
NS 16  
DS 2  
SWH 6172.839 Hz  
FIDRES 0.094190 Hz  
AQ 5.3084860 sec  
RG 256  
DW 81.000 usec  
DE 6.50 usec  
TE 300.0 K  
D1 1.00000000 sec  
TD0 1

===== CHANNEL f1 =====  
NUC1 1H  
P1 13.50 usec  
PL1 -1.00 dB  
PL1W 13.28156662 W  
SFO1 300.1318534 MHz  
SI 32768  
SF 300.1300000 MHz  
WDW EM  
SSB 0  
LB 0.30 Hz  
GB 0  
PC 1.00

<sup>1</sup>H NMR (300 MHz) Spectrum of compound 4f

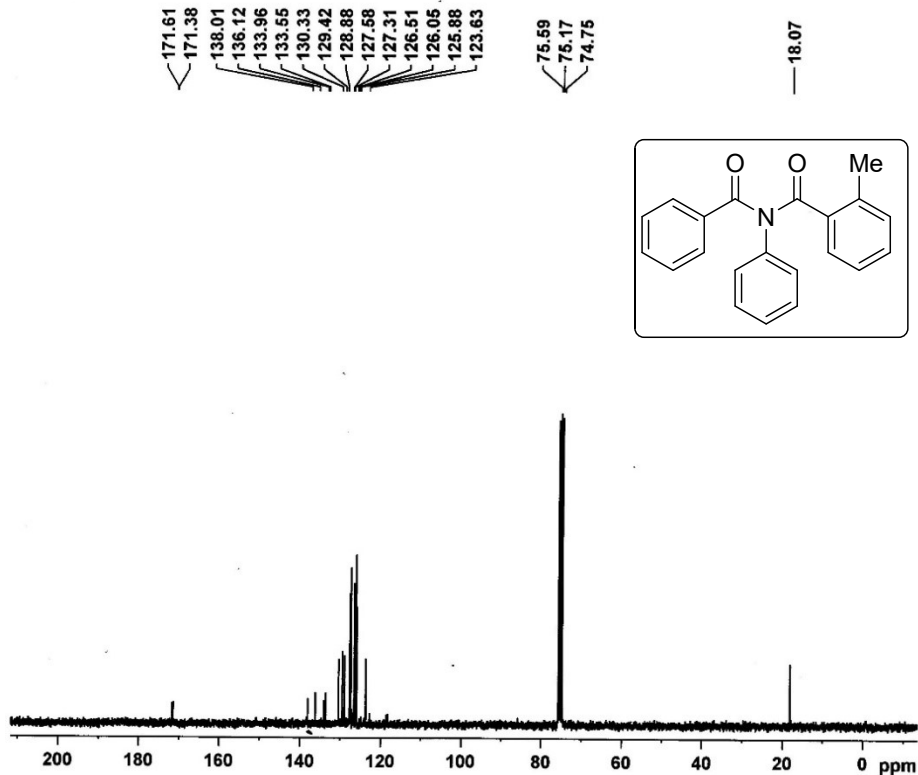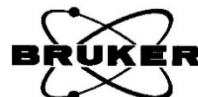

NAME RA-NL-2-139  
EXPNO 2  
PROCNO 1  
Date\_ 20200110  
Time 14.39  
INSTRUM spect  
PROBHD 5 mm DUL 13C-1  
PULPROG zgpg30  
TD 65536  
SOLVENT CDCl3  
NS 1037  
DS 4  
SWH 17985.611 Hz  
FIDRES 0.274439 Hz  
AQ 1.8219508 sec  
RG 5160.6  
DW 27.800 usec  
DE 6.50 usec  
TE 300.0 K  
D1 2.00000000 sec  
D11 0.03000000 sec  
TD0 1

===== CHANNEL f1 =====  
NUC1 13C  
P1 12.75 usec  
PL1 -1.00 dB  
PL1W 39.52846909 W  
SFO1 75.4752953 MHz

===== CHANNEL f2 =====  
CPDPRG2 waltz16  
NUC2 1H  
PCPD2 80.00 usec  
PL2 -1.00 dB  
PL12 14.46 dB  
PL13 16.00 dB  
PL2W 13.28156662 W  
PL12W 0.37778899 W  
PL13W 0.26500207 W  
SFO2 300.1312005 MHz  
SI 32768  
SF 75.4678338 MHz  
WDW EM  
SSB 0  
LB 1.00 Hz  
GB 0  
PC 1.40

<sup>13</sup>C NMR (75 MHz) Spectrum of compound 4f
